# Supplementary material for: Monitoring SARS-CoV-2 Infection Using a Double Reporter-Expressing Virus
Source: PubMed Central journal article supplement (PMC9603146; doi:10.1128/spectrum.02379-22), 2022-08-18
Supplement: reviewer-comments.pdf [file reviewer-comments.pdf]

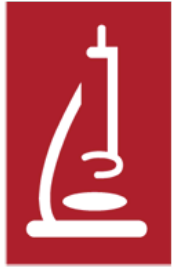

AMERICAN  
SOCIETY FOR  
MICROBIOLOGY

# Microbiology Spectrum

## Monitoring SARS-CoV-2 infection using a double reporter-expressing virus

Kevin Chiem, Jun-Gyu Park, Desarey Morales Vasquez, Richard Plemper, Jordi Torrelles, James Kobie, Mark Walter, Chengjin Ye, and Luis Martínez-Sobrido

*Corresponding Author(s): Luis Martínez-Sobrido, Texas Biomedical Research Institute*

---

### Review Timeline:

|                     |                |
|---------------------|----------------|
| Submission Date:    | June 23, 2022  |
| Editorial Decision: | July 20, 2022  |
| Revision Received:  | July 26, 2022  |
| Accepted:           | August 2, 2022 |

---

*Editor: Daniela Rajao*

*Reviewer(s): Disclosure of reviewer identity is with reference to reviewer comments included in decision letter(s). The following individuals involved in review of your submission have agreed to reveal their identity: Ghulam Abbas (Reviewer #2)*

### Transaction Report:

(Note: With the exception of the correction of typographical or spelling errors that could be a source of ambiguity, letters and reports are not edited. The original formatting of letters and referee reports may not be reflected in this compilation.)

DOI: <https://doi.org/10.1128/spectrum.02379-22>

July 20, 2022

Dr. Luis Martínez-Sobrido  
Texas Biomedical Research Institute  
San Antonio, TX

Re: Spectrum02379-22 (Monitoring SARS-CoV-2 infection using a double reporter-expressing virus)

Dear Dr. Luis Martínez-Sobrido:

Thank you for submitting your manuscript to Microbiology Spectrum. When submitting the revised version of your paper, please provide (1) point-by-point responses to the issues raised by the reviewers as file type "Response to Reviewers," not in your cover letter, and (2) a PDF file that indicates the changes from the original submission (by highlighting or underlining the changes) as file type "Marked Up Manuscript - For Review Only". Please use this link to submit your revised manuscript - we strongly recommend that you submit your paper within the next 60 days or reach out to me. Detailed instructions on submitting your revised paper are below.

Link Not Available

Below you will find instructions from the Microbiology Spectrum editorial office and comments generated during the review.

ASM policy requires that data be available to the public upon online posting of the article, so please verify all links to sequence records, if present, and make sure that each number retrieves the full record of the data. If a new accession number is not linked or a link is broken, provide production staff with the correct URL for the record. If the accession numbers for new data are not publicly accessible before the expected online posting of the article, publication of your article may be delayed; please contact the ASM production staff immediately with the expected release date.

The ASM Journals program strives for constant improvement in our submission and publication process. Please tell us how we can improve your experience by taking this quick [Author Survey](#).

Sincerely,

Daniela Rajao

Editor, Microbiology Spectrum

Journals Department  
American Society for Microbiology  
1752 N St., NW  
Washington, DC 20036  
E-mail: [spectrum@asmusa.org](mailto:spectrum@asmusa.org)

Reviewer comments:

Reviewer #1 (Comments for the Author):

This is a game-changing study that reports a carefully constructed and analyzed an advanced double reporter system for SARS-CoV-2. Overall, the authors should be commended for the amount of effort spent on this high quality study. This system could greatly assist preclinical study of COVID-19 infection. A couple of minor comments are presented to consider:

- 1) The high uptake of the virus in the brain by NLuc warrants discussion. Has that been observed in prior literature? Also this was not detected by viral plaque assay.
- 2) SARS-CoV-2 vaccines are mentioned in the introduction but not cited in ref 9-18. Some recent literature reviews could be included (e.g. Rudan et al., doi:10.1097/MCP.0000000000000868, 180, 2022; Mabrouk et al., 10.1002/adma.202107781,2107781, 2022)
- 3) As the NLuc kinetics demonstrate in Fig2, expression is present from 24 to at least 96 hr. Would cells be expected to start dying and losing expression?

4) In the conclusion or discussion, it would be useful for the authors to briefly mention examples of how fluorescence could be used for, what NLuc could be used for, and also how these modalities are expected to track with actual viral load.

Staff Comments:

### **Preparing Revision Guidelines**

To submit your modified manuscript, log onto the eJP submission site at <https://spectrum.msubmit.net/cgi-bin/main.plex>. Go to Author Tasks and click the appropriate manuscript title to begin the revision process. The information that you entered when you first submitted the paper will be displayed. Please update the information as necessary. Here are a few examples of required updates that authors must address:

- Point-by-point responses to the issues raised by the reviewers in a file named "Response to Reviewers," NOT IN YOUR COVER LETTER.
- Upload a compare copy of the manuscript (without figures) as a "Marked-Up Manuscript" file.
- Each figure must be uploaded as a separate file, and any multipanel figures must be assembled into one file.
- Manuscript: A .DOC version of the revised manuscript
- Figures: Editable, high-resolution, individual figure files are required at revision, TIFF or EPS files are preferred

For complete guidelines on revision requirements, please see the journal Submission and Review Process requirements at <https://journals.asm.org/journal/Spectrum/submission-review-process>. **Submissions of a paper that does not conform to Microbiology Spectrum guidelines will delay acceptance of your manuscript. "**

Please return the manuscript within 60 days; if you cannot complete the modification within this time period, please contact me. If you do not wish to modify the manuscript and prefer to submit it to another journal, please notify me of your decision immediately so that the manuscript may be formally withdrawn from consideration by Microbiology Spectrum.

If your manuscript is accepted for publication, you will be contacted separately about payment when the proofs are issued; please follow the instructions in that e-mail. Arrangements for payment must be made before your article is published. For a complete list of **Publication Fees**, including supplemental material costs, please visit our [website](#).

Corresponding authors may [join or renew ASM membership](#) to obtain discounts on publication fees. Need to upgrade your membership level? Please contact Customer Service at [Service@asmusa.org](mailto:Service@asmusa.org).

Thank you for submitting your paper to Microbiology Spectrum.

July 24<sup>th</sup>, 2022

Daniela Rajao  
Editor, Microbiology Spectrum  
Journals Department  
American Society for Microbiology  
1752 N St., NW  
Washington, DC 20036  
E-mail: spectrum@asmusa.org

Dear Dr. Daniela Rajao,

Thank you very much for your positive reply to our manuscript Spectrum02379-22  
**“Monitoring SARS-CoV-2 infection using a double reporter-expressing virus”** by  
Chiem et al.

We are delighted that the reviewer was very positive and interested in our paper. We truly appreciate the reviewer for her/his time and for the constructive comments and suggestions that helped us to improve the manuscript. We have introduced some changes highlighted in gray in the revised version of the document. The following below is a point-by-point response to the comments made by the reviewer.

**Reviewer general comments:** This is a game-changing study that reports a carefully constructed and analyzed an advanced double reporter system for SARS-CoV-2.

Overall, the authors should be commended for the amount of effort spent on this high quality study. This system could greatly assist preclinical study of COVID-19 infection.

**Response:** *We appreciate all the positive comments made by this reviewer, indicating that our manuscript is “a game-changing study that reports a carefully constructed and analyzed an advanced double reporter system for SARS-CoV-2”. We also thank the reviewer for indicating that “the authors should be commended for the amount of effort spent on this high quality study”. We also agree with the reviewer that the virus described in our manuscript could assist with preclinical studies of COVID-19 infection.*

### **Specific comments:**

**Comment 1:** The high uptake of the virus in the brain by NLuc warrants discussion. Has that been observed in prior literature? Also this was not detected by viral plaque assay.

**Response:** *We concur with the comment made by the reviewer on the importance of the virus detected in the brain using IVIS of the entire mice by assessing Nluc expression. We have previously observed similar levels of Nluc expression in the brain of infected animals starting, in some cases, at day 4 post-infection with a peak of Nluc expression by day 6 post-infection, just before the infected animals succumb to SARS-CoV-2 infection. We have described these findings in our previous manuscript where we described our single reporter expressing rSARS-CoV-2/Nluc (**Analysis of SARS-CoV-2 infection dynamic in vivo using reporter-expressing viruses**. PMID: 34561300). As shown in Figure 7B of the current manuscript, we were able to detect the presence of the virus in two of the animals infected with rSARS-CoV-2/mCherry-Nluc at day 6 post-infection. Notably, this correlated with the levels of Nluc expression detected in the brain of infected mice by luciferase assay (Figure 7A). More importantly, these results correlate with those we previously described with the single reporter expressing rSARS-CoV-2/Nluc (**Analysis of SARS-CoV-2 infection dynamic in vivo using reporter-expressing viruses**. PMID: 34561300). Furthermore, we and others have also demonstrate the presence of wild-type SARS-CoV-2 in the brain of infected K18 hACE2 mice at similar days post-infection (**Lethality of SARS-CoV-2 infection in K18 human angiotensin-converting enzyme 2 transgenic mice**. PMID: 33257679; **Animal Models of COVID-19: Transgenic Mouse Model**. PMID: 35554912).*

**Comment 2:** SARS-CoV-2 vaccines are mentioned in the introduction but not cited in ref 9-18. Some recent literature reviews could be included (e.g. Rudan et al., doi:10.1097/MCP.0000000000000868, 180, 2022; Mabrouk et al., 10.1002/adma.202107781,2107781, 2022).

**Response:** *We agree with the comment made by the reviewer and apologize for not including this important references that have now been included in the revised manuscript.*

**Comment 3:** As the NLuc kinetics demonstrate in Fig2, expression is present from 24 to at least 96 hr. Would cells be expected to start dying and losing expression?

**Response:** *We thank the reviewer for bringing this important comment to our consideration. We have observed Nluc expression in cells infected with rSARS-CoV-2/Nluc or rSARS-CoV-2/mCherry-Nluc as early as 12 hours post-infection that increase in a time dependent matter and peak at 72 hours (Figure 2B). The decrease in Nluc expression at 96 hours, as indicated by the reviewer, is because of the cytopathic effect induced by the virus that results in losing expression. Similar findings were observed in the manuscript describing the single reporter expressing rSARS-CoV-2/Nluc (**Analysis of SARS-CoV-2 infection dynamic in vivo using reporter-expressing viruses.** PMID: 34561300).*

**Comment 4:** In the conclusion or discussion, it would be useful for the authors to briefly mention examples of how fluorescence could be used for, what NLuc could be used for, and also how these modalities are expected to track with actual viral load.

**Response:** *We agree with the comment made by the reviewer and we thank her/him for this suggestion. Following the comment made by the reviewer, we have included in the revised manuscript a brief description on how the fluorescent (mCherry) and luciferase (Nluc) expression from our rSARS-CoV-2/mCherry-Nluc could be used.*

We hope that by taking into account the comments and suggestions made by the reviewer the manuscript has improved, and we hope that now it could be accepted for publication at Microbiology Spectrum. Finally, we want to thank again the reviewer for her/his helpful and constructive comments that contributed to improve our manuscript.

Sincerely,

Luis Martinez-Sobrido, PhD

Texas Biomedical Research Institute.

August 2, 2022

Dr. Luis Martínez-Sobrido  
Texas Biomedical Research Institute  
San Antonio, TX

Re: Spectrum02379-22R1 (Monitoring SARS-CoV-2 infection using a double reporter-expressing virus)

Dear Dr. Luis Martínez-Sobrido:

Your manuscript has been accepted, and I am forwarding it to the ASM Journals Department for publication. You will be notified when your proofs are ready to be viewed.

The ASM Journals program strives for constant improvement in our submission and publication process. Please tell us how we can improve your experience by taking this quick [Author Survey](#).

As an open-access publication, Spectrum receives no financial support from paid subscriptions and depends on authors' prompt payment of publication fees as soon as their articles are accepted. You will be contacted separately about payment when the proofs are issued; please follow the instructions in that e-mail. Arrangements for payment must be made before your article is published. For a complete list of **Publication Fees**, including supplemental material costs, please visit our [website](#).

ASM policy requires that data be available to the public upon online posting of the article, so please verify all links to sequence records, if present, and make sure that each number retrieves the full record of the data. If a new accession number is not linked or a link is broken, provide production staff with the correct URL for the record. If the accession numbers for new data are not publicly accessible before the expected online posting of the article, publication of your article may be delayed; please contact the ASM production staff immediately with the expected release date.

Corresponding authors may [join or renew ASM membership](#) to obtain discounts on publication fees. Need to upgrade your membership level? Please contact Customer Service at [Service@asmusa.org](mailto:Service@asmusa.org).

Thank you for submitting your paper to Spectrum.

Sincerely,

Daniela Rajao  
Editor, Microbiology Spectrum

Journals Department  
American Society for Microbiology  
1752 N St., NW  
Washington, DC 20036  
E-mail: [spectrum@asmusa.org](mailto:spectrum@asmusa.org)

1 **Monitoring SARS-CoV-2 infection using a double reporter-expressing virus**

2 Kevin Chiem<sup>1</sup>, Jun-Gyu Park<sup>1</sup>, Desarey Morales Vasquez<sup>1</sup>, Richard K. Plemper<sup>2</sup>, Jordi

3 B. Torrelles<sup>1</sup>, James J. Kobie<sup>3</sup>, Mark R. Walter<sup>4</sup>, Chengjin Ye<sup>1\*</sup>, Luis Martinez-Sobrido<sup>1\*</sup>

4

5 <sup>1</sup> Texas Biomedical Research Institute, San Antonio, Texas 78227, USA

6 <sup>2</sup> Center for Translational Antiviral Research, Institute for Biomedical Sciences, Georgia

7 State University, Atlanta, GA, USA

8 <sup>3</sup> Department of Medicine, Division of Infectious Diseases, University of Alabama at

9 Birmingham, Birmingham, Alabama 35294, USA

10 <sup>4</sup> Department of Microbiology, University of Alabama at Birmingham, Birmingham,

11 Alabama 35294, USA

12

13 \*Lead contact email and correspondence:

14 [cye@txbiomed.org](mailto:cye@txbiomed.org)

15 [lmartinez@txbiomed.org](mailto:lmartinez@txbiomed.org)

16

17 **Running title:** A double reporter-expressing recombinant SARS-CoV-2

18

19

20

21

22

23

24



25 **ABSTRACT**

26 Severe acute respiratory syndrome coronavirus 2 (SARS-CoV-2) is the highly  
27 contagious agent responsible for the coronavirus disease 2019 (COVID-19) pandemic.  
28 An essential requirement for understanding SARS-CoV-2 fundamental biology and the  
29 impact of anti-viral therapeutics are robust methods to detect for the presence of the  
30 virus in infected cells or animal models. Despite the development and successful  
31 generation of recombinant (r)SARS-CoV-2 expressing fluorescent or luciferase reporter  
32 genes, knowledge acquired from their use in *in vitro* assays and/or in live animals are  
33 limited to the properties of the fluorescent or luciferase reporter genes. Herein, for the  
34 first time, we engineered a replication-competent rSARS-CoV-2 that expresses both  
35 fluorescent (mCherry) and luciferase (Nluc) reporter genes (rSARS-CoV-2/mCherry-  
36 Nluc) to overcome limitations associated with the use of a single reporter gene. In  
37 cultured cells, rSARS-CoV-2/mCherry-Nluc displayed similar viral fitness as rSARS-  
38 CoV-2 expressing single reporter fluorescent and luciferase genes (rSARS-CoV-  
39 2/mCherry and rSARS-CoV-2/Nluc, respectively), or wild-type (WT) rSARS-CoV-2,  
40 while maintaining comparable expression levels of both reporter genes. *In vivo*, rSARS-  
41 CoV-2/mCherry-Nluc has similar pathogenicity in K18 human angiotensin converting  
42 enzyme 2 (hACE2) transgenic mice than rSARS-CoV-2 expressing individual reporter  
43 genes, or WT rSARS-CoV-2. Importantly, rSARS-CoV-2/mCherry-Nluc facilitates the  
44 assessment of viral infection and transmission in golden Syrian hamsters using *in vivo*  
45 imaging systems (IVIS). Altogether, this study demonstrates the feasibility of using this  
46 novel bireporter-expressing rSARS-CoV-2 for the study SARS-CoV-2 *in vitro* and *in*  
47 *vivo*.

48  
49  
50  
51  
52  
53  
54  
55  
56  
57  
58  
59  
60  
61  
62  
63  
64  
65  
66  
67  
68  
69  
70

**IMPORTANCE**

Despite the availability of vaccines and antivirals, the coronavirus disease 2019 (COVID-19) pandemic caused by Severe Acute Respiratory Syndrome Coronavirus 2 (SARS-CoV-2) continues to ravage health care institutions worldwide. Previously, we have generated replication-competent recombinant (r)SARS-CoV-2 expressing fluorescent or luciferase reporter proteins to track viral infection *in vitro* and/or *in vivo*. However, these rSARS-CoV-2 are restricted to express only a single fluorescent or a luciferase reporter gene, limiting or preventing their use to specific *in vitro* assays and/or *in vivo* studies. To overcome this limitation, we have engineered a rSARS-CoV-2 expressing both fluorescent (mCherry) and luciferase (Nluc) genes and demonstrated its feasibility to study the biology of SARS-CoV-2 *in vitro* and/or *in vivo*, including the identification and characterization of neutralizing antibodies and/or antivirals. Using rodent models, we visualize SARS-CoV-2 infection and transmission through *in vivo* imaging systems (IVIS).

71

## 72 INTRODUCTION

73 Severe acute respiratory syndrome coronavirus 2 (SARS-CoV-2) is responsible for  
74 the coronavirus disease 2019 (COVID-19) pandemic (1). Since the first reported case in  
75 Wuhan, China, SARS-CoV-2 has spread worldwide and has been associated with more  
76 than 500 million confirmed cases and over 6 million deaths  
77 (<https://coronavirus.jhu.edu/map.html>) (2), in part due to its innate high transmissibility  
78 (3, 4). In the past two decades, two other human coronaviruses have been responsible  
79 for severe disease in humans, including severe acute respiratory syndrome coronavirus  
80 (SARS-CoV) in 2002 and the Middle East respiratory syndrome coronavirus (MERS-  
81 CoV) in 2012 (5, 6). Further, four endemic human coronaviruses are responsible for  
82 common cold-like respiratory disease: OC43, NL63, 229E, and HKU1 (7, 8). A unique  
83 feature of SARS-CoV-2 compared to known betacoronaviruses is the addition of a furin  
84 cleavage site in the viral spike (S) glycoprotein which is a major contributor to the virus's  
85 increased transmissibility and pathogenicity (9, 10). Several prophylactic (vaccines) and  
86 therapeutic (antivirals or monoclonal antibodies) options have been approved by the  
87 United States (US) Food and Drug Administration (FDA) to prevent or treat,  
88 respectively, SARS-CoV-2 infection. These include three vaccines [Spikevax (former  
89 Moderna), COMIRNATY (former BioNTech & Pfizer), and Janssen] (11, 12), several  
90 therapeutic antiviral drugs (remdesivir, baricitinib, molnupiravir, and nirmatrelvir), and  
91 one monoclonal antibody (MAb, bamlanivimab) (13-15). Unfortunately, SARS-CoV-2  
92 has rapidly accumulated mutations, leading to the emergence of variants of concern

93 (VoC) and variants of interest (VoI) jeopardizing the effectiveness of existing preventive  
94 and/or treatment options (16-20).

95 Reverse genetics systems have permitted the generation of recombinant RNA  
96 viruses entirely from cloned cDNA, facilitating studies to better understand multiple  
97 aspects of the biology of viruses, including, among others, mechanisms of viral  
98 infection, pathogenesis, transmission, and disease (21-31). Another application of  
99 reverse genetics is the generation of recombinant viruses containing gene mutations  
100 and/or deletions that result in viral attenuation for their implementation as safe,  
101 immunogenic, and protective live-attenuated vaccines (LAV) (22, 32-37). Moreover,  
102 reverse genetics have been used to generate recombinant viruses expressing reporter  
103 proteins, thereby abolishing the need of secondary approaches for viral detection (38-  
104 44). In this regard, genetically modified recombinant viruses expressing reporter genes  
105 have been generated to monitor viral infection in cultured cells and/or in animal models  
106 using reporter expression as a valid surrogate readout for viral infection (38, 45-49).  
107 Notably, these reporter-expressing viruses have the potential to be used in high-  
108 throughput screening (HTS) settings to identify antivirals or neutralizing antibodies that  
109 can inhibit or neutralize, respectively, viral infection; and to visualize the dynamics of  
110 viral infection in validated animal models using *in vivo* imaging systems (IVIS).

111 Fluorescent and luciferase proteins are used to generate reporter-expressing viruses  
112 and represent ideal choices due to their high sensitivity and stability (50-56). Since  
113 these reporter genes have dissimilar characteristics, their selection is largely motivated  
114 by the type of study or application. Fluorescent proteins are easily detected when  
115 excited by absorbing energy at a particular wavelength, which is subsequently emitted

116 as light at higher wavelength as the molecules drop to a lesser energy state (55).  
117 Hence, reporter viruses expressing fluorescent proteins are typically used for *in vitro*  
118 studies to observe cellular localization and/or to identify the presence of infected cells  
119 (27, 38, 39, 47, 57). Moreover, fluorescence-expressing recombinant viruses are used  
120 to identify the presence of the virus in infected cells in validated animal models using *ex*  
121 *vivo* imaging (38, 39, 45-47). However, *in vivo*, fluorescent signals are often obscured  
122 by autofluorescence and have insufficient detection due to light scattering. Conversely,  
123 luciferases produce bright and localized signals in live organisms to be monitored in  
124 real-time using IVIS and represent a viable surrogate of viral replication (38, 39, 58).  
125 Moreover, viruses expressing luciferase genes are more sensitive and convenient for  
126 quantitative analyses compared to their fluorescent-expressing counterparts (39, 45,  
127 48). Despite the clear advantages of both fluorescence and luciferase reporter genes,  
128 only recombinant viruses expressing either fluorescent or luciferase reporter genes  
129 have been previously described in the literature (38, 45, 46, 48, 49). In the past, we  
130 overcame this issue by generating dual reporter viruses expressing both luciferase and  
131 fluorescent reporter genes and demonstrated its advantages with influenza and vaccinia  
132 viruses (38, 39, 58).

133 In this study, we used our previously described bacterial artificial chromosome  
134 (BAC)-based reverse genetics (22, 23, 59-61) and the innovative 2A approach (45, 46)  
135 to pioneer a rSARS-CoV-2 expressing both fluorescence mCherry and luciferase Nluc  
136 reporter genes (rSARS-CoV-2/mCherry-Nluc). Our results demonstrate that rSARS-  
137 CoV-2/mCherry-Nluc has similar properties in cultured cells than rSARS-CoV-2  
138 expressing individual mCherry or Nluc reporter genes, or wild-type (WT) rSARS-CoV-2.

139 Importantly expression of the double reporter gene mCherry-Nluc did not affect viral  
140 replication or pathogenesis in K18 human angiotensin converting enzyme 2 (hACE2)  
141 transgenic mice or golden Syrian hamsters, validating its use for both *in vitro* and/or *in*  
142 *vivo* studies.

## 143 **MATERIAL AND METHODS**

### 144 **Biosafety and ethics statement**

145 *In vitro* and *in vivo* experiments involving infectious rSARS-CoV-2 were conducted in  
146 a biosafety level 3 (BSL3) laboratory at Texas Biomedical Research Institute.  
147 Experimental procedures involving cell culture and animal studies were approved by the  
148 Texas Biomedical Research Institute Biosafety and Recombinant DNA Committees  
149 (BSC and RDC, respectively) and the Institutional Animal Care and Use Committee  
150 (IACUC).

### 151 **Cells and viruses**

152 African green monkey kidney epithelial cells (Vero E6; CRL-1586) were propagated  
153 and maintained in Dulbecco's modified Eagle's medium (DMEM; Corning)  
154 supplemented with 5% fetal bovine serum (FBS; VWR) and 1% PSG (100 U/ml  
155 penicillin, 100 µg/ml streptomycin, and 2 mM L-glutamine; Corning) at 37°C with 5%  
156 CO<sub>2</sub>.

157 Recombinant (r)SARS-CoV-2 were generated based on the whole genomic  
158 sequence of the USA-WA1/2020 (WA-1) strain (accession no. MN985325) (45, 60)  
159 using a previously described bacterial artificial chromosome (BAC)-based reverse  
160 genetics system (22, 23, 59-61). Viral titers (plaque forming units per milliliter, PFU/ml)  
161 were determined by plaque assay in Vero E6 cells.

## 162 **Rescue of recombinant double reporter-expressing SARS-CoV-2**

163 A BAC plasmid was used for the rescue of rSARS-CoV-2 expressing mCherry and  
164 Nanoluciferase (Nluc), referred as rSARS-CoV-2/mCherry-Nluc, as previously described  
165 (45). Briefly, a fused version of mCherry and Nluc was inserted in front of the viral N  
166 protein gene along with a porcine teschovirus 1 (PTV-1) 2A autocleavage site, within  
167 the pBeloBAC11 plasmid (NEB) containing the whole genomic sequence of SARS-CoV-  
168 2 WA-1 strain. We chose mCherry because red fluorescent proteins are more readily  
169 detectable in biological tissues, enabling lower absorbance and scattering of light, as  
170 well as less autofluorescence (47, 62-64). We selected Nluc due to its small size, ATP  
171 independence, and greater sensitivity and brightness compared with other luciferases  
172 (45, 48, 50, 65). Vero E6 cells ( $1.2 \times 10^6$  cells/well, 6-well plate format, triplicates) were  
173 transfected in suspension with 4.0  $\mu\text{g}$ /well of SARS-CoV-2/mCherry-Nluc BAC plasmid  
174 using Lipofectamine 2000 (Thermo Fisher Scientific). Transfection media was changed  
175 to post-infection media (DMEM containing 2% FBS and 1% PSG) after 24 h, and cells  
176 were split and seeded into T75 flasks 2-days post-transfection. After 3 days, viral  
177 rescues were detected by fluorescence microscopy, and cell culture supernatants were  
178 collected, labeled as P0 and stored at  $-80^\circ\text{C}$ . After viral titration, P1 viral stocks were  
179 generated by infecting fresh Vero E6 cells at low multiplicity of infection (MOI) 0.0001  
180 for 3 days and following stored at  $-80^\circ\text{C}$ .

## 181 **Reverse transcription (RT)-PCR**

182 Total RNA was extracted from rSARS-CoV-2/mCherry-Nluc-infected (MOI 0.01)  
183 Vero E6 cells ( $1.2 \times 10^6$  cells/well, 6-well format) using TRIzol reagent (Thermo Fisher  
184 Scientific) based on the manufacturer's instructions. The viral genome between 27,895-

185 29,534 nucleotides based on the SARS-CoV-2 WA-1 strain was RT-PCR amplified  
186 using Super Script II Reverse transcriptase (Thermo Fisher Scientific) and Expanded  
187 High Fidelity PCR system (Sigma Aldrich). Amplified DNA products were separated on  
188 a 0.7% agarose gel, purified using a Wizard Genomic DNA Purification kit (Promega),  
189 and sent for Sanger sequencing (ACGT). Primer sequences are available upon request.

190

### 191 **Deep sequencing**

192 RNA sequencing library was prepared with a KAPA RNA HyperPrep kit, involving  
193 100 ng of viral RNA and 7 mM of adaptor, and was subjected to 45 min adaptor ligation  
194 incubation and 6 cycles of PCR. An Illumina Hiseq X was used to sequence all samples  
195 and raw sequencing reads were trimmed and filtered using Trimmomatic V0.32 (66, 67).  
196 Bowtie2 V2.4.1 (68) and MosDepth V0.2.6 (69) were used to map sequence reads and  
197 quantify genome coverage to reference SARS-CoV-2-WA1/2020 viral genome  
198 (MN985325.1), respectively. LoFreq V2.1.3.1 (70) was used to determine low frequency  
199 variants and eliminate sites that were less than 100 read depth or less than 1% allele  
200 frequencies.

### 201 **Immunofluorescence assays**

202 Vero E6 cells ( $1.2 \times 10^6$  cells/well, 6-well format, triplicates) were mock-infected or  
203 infected (MOI 0.01) with rSARS-CoV-2/WT, rSARS-CoV-2/mCherry, rSARS-CoV-  
204 2/Nluc, or rSARS-CoV-2/mCherry-Nluc. At 24 h post-infection (hpi), cells were fixed in  
205 10% neutral buffered formalin at 4°C overnight and permeabilized using 0.5% Triton X-  
206 100 in phosphate-buffered saline (PBS) for 10 min at room temperature (RT). Cells  
207 were washed with PBS, blocked with 2.5% bovine albumin serum (BSA) in PBS for 1 h



208 and then incubated with 1 µg/ml of SARS-CoV anti-N monoclonal antibody (MAb)  
209 1C7C7 in 1% BSA at 4°C overnight. Cells were washed with PBS and incubated with a  
210 fluorescein isothiocyanate (FITC)-conjugated goat anti-mouse IgG (Dako; 1:200). Cell  
211 nuclei were stained with 4', 6'-diamidino-2-phenylindole (DAPI; Research Organics).  
212 Representative images (20X) were acquired using an EVOS M5000 imaging system  
213 (Thermo Fisher Scientific).

#### 214 **SDS-PAGE and Western blot**

215 Cell lysates were prepared from either mock- or virus-infected (MOI 0.01) Vero E6  
216 cells ( $1.2 \times 10^6$  cells/well, 6-well format) after 24 hpi using passive lysis buffer  
217 (Promega) based on the manufacturer's instructions. After centrifugation (12,000 x g) at  
218 4°C for 30 min, proteins were separated with 12% SDS-PAGE and transferred to  
219 nitrocellulose membranes. Membranes were blocked for 1 h with 5% dried skim milk in  
220 0.1% Tween 20 PBS (T-PBS) and incubated at 4°C overnight with the following specific  
221 primary MAbs or polyclonal antibodies (PABs): N (mouse MAb 1C7C7), mCherry (rabbit  
222 Pab; Raybiotech), and Nluc (rabbit Pab, Promega). Then, membranes were incubated  
223 at 37°C for 1 h with goat anti-mouse IgG StarBright Blue 520 or anti-rabbit IgG  
224 Starbright Blue 700 (Bio-Rad) secondary antibodies. Tubulin was used as a loading  
225 control using anti-tubulin hFAB rhodamine antibody (Bio-Rad). Proteins were detected  
226 using a ChemiDoc MP imaging system (Bio-Rad).

#### 227 **Plaque assay**

228 Vero E6 cells ( $2 \times 10^5$  cells/well, 24-well plate format, triplicates) were infected with  
229 25-50 PFUs of rSARS-CoV-2/WT, rSARS-CoV-2/mCherry, rSARS-CoV-2/Nluc, or  
230 rSARS-CoV-2/mCherry-Nluc for 1 h, overlaid with post-infection media containing 0.6%

231 agar (Oxoid) and incubated at 37°C in a 5% CO<sub>2</sub> incubator. At 72 hpi, cells were fixed in  
232 10% neutral buffered formalin at 4°C overnight and then mCherry-positive plaques were  
233 visualized using a ChemiDoc MP imaging system (Bio-Rad). Afterwards, cells were  
234 permeabilized in T-PBS for 10 min at RT, blocked in 2.5% BSA in PBS for 1 h, and  
235 incubated with specific primary MAb or PAb against the viral N protein (mouse MAb  
236 1C7C7) or Nluc (rabbit PAb). To detect Nluc-positive viral plaques, cells were stained  
237 with a FITC-conjugated goat anti-rabbit IgG (Dako; 1:200) and visualized using a  
238 ChemiDoc MP imaging system (Bio-Rad). Next, viral plaques were stained with an anti-  
239 mouse Vectastain ABC kit and DAB HRP Substrate kit (Vector laboratories) following  
240 the manufacturers' recommendations.

#### 241 **Viral growth kinetics**

242 Vero E6 cells (1.2 x 10<sup>6</sup> cells/well, 6-well plate format, triplicates) were infected (MOI  
243 0.01) with rSARS-CoV-2/WT, rSARS-CoV-2/mCherry, rSARS-CoV-2/Nluc, or rSARS-  
244 CoV-2/mCherry-Nluc. After 1 h adsorption, cells were washed with PBS and incubated  
245 at 37°C in post-infection media. Viral titers in cell culture supernatants at each of the  
246 indicated time points (12, 24, 48, 72, and 96 hpi) were determined by plaque assay as  
247 described above. At each time point, mCherry expression was visualized with an EVOS  
248 M5000 imaging system. Nluc activity in the cell culture supernatants at the same times  
249 post-infection was quantified using a microplate reader and a Nano-Glo Luciferase  
250 Assay system (Promega) following the manufacturers' recommendations. Mean values  
251 and standard deviation (SD) were calculated with Microsoft Excel software.

#### 252 **Reporter-based microneutralization and antiviral assays**

253        Microneutralization and antiviral assays were performed as previously described (47,  
254 71). Human MAb 1212C2 (72) against the Spike protein receptor-binding domain (RBD)  
255 of SARS-CoV-2 was serially diluted (3-fold) in post-infection media (starting  
256 concentration of 500 ng), combined with 100-200 PFUs/well of rSARS-CoV-2/WT,  
257 rSARS-CoV-2/mCherry, rSARS-CoV-2/Nluc, or rSARS-CoV-2/mCherry-Nluc and  
258 incubated at RT for 1 h. Then, Vero E6 cells ( $4 \times 10^4$  cells/well, 96-well plate format,  
259 quadruplicates) were infected with the antibody-virus mixture and incubated at 37°C in a  
260 5% CO<sub>2</sub> incubator. Cells infected with rSARS-CoV-2/WT were overlaid with 1% Avicel  
261 as previously described (71). Nluc activity in cell culture supernatants of cells infected  
262 with rSARS-CoV-2/Nluc or rSARS-CoV-2/mCherry-Nluc was quantified at 24 hpi using  
263 Nano-Glo luciferase substrate as per manufacturer's instructions, and a Synergy LX  
264 microplate reader and analyzed using a Gen5 data analysis software (Bio-Tek). To  
265 measure mCherry signal, cells infected with rSARS-CoV-2/mCherry or rSARS-CoV-  
266 2/mCherry-Nluc were fixed in 10% neutral buffered formalin overnight and washed with  
267 PBS before quantified in a Synergy LX microplate reader. For cells infected with rSARS-  
268 CoV-2/WT, plaques were detected using the anti-N MAb 1C7C7 as indicated above and  
269 quantified using an ImmunoSpot Analyzer (CTL). Total viral infection (100%) was  
270 determined from the number of plaques, fluorescence and luciferase values obtained  
271 from virus-infected cells without the 1212C2 hMAb. Viral infection means and SD values  
272 were calculated from quadruplicate individual wells of three independent experiments  
273 with Microsoft Excel software. Non-linear regression curves and 50% neutralization titer  
274 (NT<sub>50</sub>) values were determined using GraphPad Prism Software (San Diego, CA, USA,  
275 V. 8.2.1).

276 Inhibition of SARS-CoV-2 in antiviral assays was conducted as previously described  
277 (47, 71). Briefly, Vero E6 cells ( $4 \times 10^4$  cells/well, 96-well plate format, quadruplicates)  
278 were infected with 100-200 PFUs/well of rSARS-CoV-2/WT, rSARS-CoV-2/mCherry,  
279 rSARS-CoV-2/Nluc, or rSARS-CoV-2/mCherry-Nluc and incubated at 37°C for 1 h.  
280 Afterwards, the virus inoculum was removed and replaced with post-infection media  
281 containing 3-fold serial dilutions of remdesivir (starting concentration of 100  $\mu$ M) and  
282 cells were incubated at 37°C in a 5% CO<sub>2</sub> incubator. Cells infected with rSARS-CoV-  
283 2/WT were overlaid with 1% Avicel as previously described (71). After 24 hpi, Nluc  
284 activity from cell culture supernatants infected with rSARS-CoV-2/Nluc or rSARS-CoV-  
285 2/mCherry-Nluc was determined using Nano-Glo luciferase substrate and a Synergy LX  
286 microplate reader. For cells infected with rSARS-CoV-2/mCherry or rSARS-CoV-  
287 2/mCherry-Nluc, mCherry expression was quantified in a Synergy LX microplate reader.  
288 Lastly, rSARS-CoV-2/WT was detected using the anti-N MAb 1C7C7 and quantified  
289 using an ImmunoSpot Analyzer (CTL). Total viral infection (100%) was calculated from  
290 number of plaques, fluorescence, and luciferase values of infected cells in the absence  
291 of remdesivir. Means and SD values were calculated from quadruplicates from three  
292 independent experiments with Microsoft Excel software. The 50% effective  
293 concentration (EC<sub>50</sub>) was calculated by sigmoidal dose-response curves on GraphPad  
294 Prism (San Diego, CA, USA, Version 8.2.1).

## 295 **Mice experiments**

296 Female 4-6 weeks old K18 hACE2 transgenic mice [B6.Cg-Tg(K18-ACE2)2PrImn/J,  
297 The Jackson laboratory] were maintained in the animal care facility at Texas Biomedical  
298 Research Institute under specific pathogen-free conditions. For viral infections, groups

299 of mice were anesthetized with gaseous isoflurane and inoculated intranasally with the  
300 indicated viruses. A separate group of K18 hACE2 transgenic mice were also mock-  
301 infected with PBS and served as a negative control.

302 For body weight and survival studies, K18 hACE2 transgenic mice (n=4) were  
303 intranasally infected with  $10^5$  PFUs/mouse of the indicated viruses and monitored daily  
304 for body weight loss and survival to assess morbidity and mortality, respectively, over a  
305 period of 12 days. Mice that were below 75% of their initial body weight were  
306 considered to have reached their experimental endpoint and were humanely euthanized.

307 *In vivo* bioluminescence imaging of live mice (n=4) was conducted with an Ami HT *in*  
308 *vivo* imaging system (IVIS; Spectral Instruments) at 1, 2, 4, and 6 days post-infection  
309 (DPI). At each time points, mice were anesthetized with isoflurane and retro-orbitally  
310 injected with 100  $\mu$ l of Nano-Glo luciferase substrate diluted by 1:10 in PBS. Mice were  
311 immediately placed in an isolation chamber and imaged using the Ami HT IVIS.  
312 Radiance within the region of interest (ROI) of each mouse was analyzed using the  
313 Aura software (Spectral Instruments) and total flux values (photons/s) were normalized  
314 to background signal of mock-infected control.

315 To assess fluorescence expression in the lungs and to determine viral titers, a  
316 separate cohort of mice (n=4) were similarly infected with the indicated recombinant  
317 viruses and were humanely euthanized at 2 and 4 DPI after *in vivo* imaging. Lungs were  
318 surgically excised, washed in PBS, and fluorescent and brightfield images were  
319 obtained using an Ami HT IVIS and an iPhone 6s (Apple), respectively. Fluorescence  
320 signal (radiance efficiency) around the ROI of the lungs were quantified using the Aura  
321 software and mean values were normalized to the autofluorescence of mock-infected

322 lungs. The macroscopic pathology score was determined in a blinded manner by a  
323 certified pathologist from brightfield images of the lungs, in which the percent of total  
324 surface area of lungs affected by consolidation, lesions, congestion, and/or atelectasis  
325 was quantified with NIH ImageJ software as previously described (60, 73). Nasal  
326 turbinate and brains were also collected, and tissues were individually homogenized in  
327 1 ml of PBS using a Precellys tissue homogenizer (Bertin Instruments). Tissue  
328 homogenates were centrifuged at 12,000 x *g* at 4°C for 5 min to pellet cell debris, and  
329 supernatants were collected. Viral titers were determined by plaque assay and  
330 immunostaining as described above. Nluc activity in the tissue homogenates were  
331 determined using Nano-Glo luciferase substrate kit and a Synergy LX microplate  
332 reader.

### 333 **Hamster experiments**

334 Female 4-6 weeks old golden Syrian hamsters (*Mesocricetus auratus*) were  
335 purchased from Charles River Laboratories and maintained in the animal care facility at  
336 Texas Biomedical Research Institute under specific pathogen-free conditions. For viral  
337 infections, hamsters were anesthetized with isoflurane and intranasally infected with  
338 rSARS-CoV-2/mCherry-Nluc. One day later, infected hamsters were transferred to  
339 cages containing contact naïve hamsters. A separate group of hamsters were also  
340 mock-infected with PBS and served as a negative control.

341 *In vivo* bioluminescence imaging of live hamsters (n=4) was conducted with an Ami  
342 HT IVIS on 2, 4 and 6 DPI. Hamsters were anesthetized with gaseous isoflurane in an  
343 isolation chamber, and Nano-Glo luciferase substrate was diluted 1:10 in PBS and  
344 retro-orbitally injected into each animal (200 µl). Immediately after, hamsters were

345 secured in the isolation chamber and imaged with an Ami HT IVIS and bioluminescence  
346 analyses were performed. The total flux values were obtained around the ROI of each  
347 hamster and normalized to mock-infected hamsters. Next, hamsters were euthanized,  
348 and mCherry expression in excised lungs were imaged in an Ami HT IVIS. The Aura  
349 software was used to determine the radiant efficiency of the ROI. Fluorescence signal  
350 obtained from infected or contact lungs were normalized to mock-infected lungs.  
351 Brightfield images of lungs were taken using an iPhone 6s and were used to assess the  
352 pathology score in a blinded manner. A trained pathologist determined the percent of  
353 lung surface that was affected by lesions, congestion, consolidation, and/or atelectasis  
354 using NIH ImageJ (60, 73). Along with the lungs, nasal turbinate were excised and  
355 homogenized in PBS using a Precellys tissue homogenizer at 12,000 x g for 5 min.  
356 Supernatants were collected and used to determine viral titers and Nluc activity as  
357 described above.

### 358 **Statistical analysis**

359 All data are presented as mean values and SD for each group and were analyzed  
360 using Microsoft Excel software. A one-way ANOVA or student t-test was used for  
361 statistical analysis on GraphPad Prism or Microsoft Word software, respectively. \*, p <  
362 0.05; \*\*, p < 0.01; \*\*\*, p < 0.001; \*\*\*\*, p < 0.0001; and ns, no significance.

363

364

365

366

367

368  
369  
370  
371  
372  
373  
374  
375  
376  
377  
378  
379  
380  
381  
382  
383  
384  
385  
386  
387  
388  
389  
390

## **RESULTS**

### **Generation of rSARS-CoV-2/mCherry-Nluc**

Recently, we have generated rSARS-CoV-2 expressing single reporter genes upstream of the viral N gene using a PTV-1 2A autoproteolytic peptide approach (25). These new rSARS-CoV-2 displayed higher levels of reporter gene expression than those previously described in which the reporter gene substitutes the viral ORF7a protein (45-47). To generate a rSARS-CoV-2 expressing two reporter genes, mCherry and Nluc, we implemented a similar method and inserted a fusion sequence of mCherry-Nluc, and the PTV-1 2A autoproteolytic peptide, upstream of the SARS-CoV-2 N gene in the BAC containing a full length copy of the SARS-CoV-2 genome (**Figure 1A**), and rescued rSARS-CoV-2/mCherry-Nluc using our previously described protocol (46, 60). To assess whether mCherry expression could be directly visualized by fluorescence microscopy, Vero E6 cells were mock-infected or infected (MOI 0.01) with



391 rSARS-CoV-2/WT, rSARS-CoV-2/mCherry, rSARS-CoV-2/Nluc, or rSARS-CoV-  
392 2/mCherry-Nluc (**Figure 1B**). At 24 hpi, cells were fixed and mCherry expression was  
393 directly assessed under a fluorescence microscope, which showed high mCherry  
394 fluorescence expression in cells infected with rSARS-CoV-2/mCherry or rSARS-CoV-  
395 2/mCherry-Nluc, but not in cells infected with rSARS-CoV-2/WT or rSARS-CoV-2/Nluc  
396 (**Figure 1B**). Further, viral infection was detected by indirect immunofluorescence  
397 microscopy using an anti-N protein 1C7C7 MAb (**Figure 1B**). As expected, all Vero E6  
398 cells infected with the different rSARS-CoV-2 mutants, but not mock-infected cells, were  
399 positive for the presence of the virus. Expression of mCherry and Nluc reporter genes  
400 were also confirmed by Western blot (**Figure 1C**). As expected, mCherry was readily  
401 detected in whole cell lysates from Vero E6 cells infected with rSARS-CoV-2/mCherry  
402 or rSARS-Cov-2/mCherry-Nluc but not in those infected with rSARS-CoV-2/WT or  
403 rSARS-CoV-2/Nluc; or mock-infected (**Figure 1C**). Likewise, Nluc was detected only in  
404 cell extracts from rSARS-CoV-2/Nluc and rSARS-CoV-2/mCherry-Nluc infected cells  
405 and not in those infected with rSARS-CoV-2/WT or rSARs-CoV-2/mCherry; or mock-  
406 infected (**Figure 1C**). A specific band for the viral N protein appeared in all the virus-  
407 infected cell extracts, but not in mock-infected Vero E6 cell extracts, all of which showed  
408 comparable protein levels of N protein expression (**Figure 1C**). The identity of the  
409 double reporter-expressing rSARS-CoV-2/mCherry-Nluc was further validated by next  
410 generation sequencing (**Figure 1D**). The rSARS-CoV-2/mCherry and rSARS-CoV-  
411 2/Nluc were also sequenced as reference controls. We found two non-reference alleles  
412 with a frequency greater than 10% in rSARS-CoV-2/mCherry in the viral N (C752T) and  
413 envelope, E (V5A) proteins (**Figure 1D**, top). Likewise, we identified two amino acid

414 changes in the rSARS-CoV-2/Nluc S (H655Y) and E (S6L) proteins (**Figure 1D**,  
415 middle). No amino acid changes were found in rSARS-CoV-2/mCherry-Nluc compared  
416 to the reference viral genome (**Figure 1D**, bottom), indicating that rSARS-CoV-  
417 2/mCherry-Nluc resembles the sequence of rSARS-CoV-2/WT apart from the insertion  
418 of the mCherry-Nluc reporter gene fusion and the PTV-1 2A autoproteolytic site.

#### 419 ***In vitro* characterization of rSARS-CoV-2/mCherry-Nluc**

420 Since the cloning of two reporter genes as a fusion protein could affect viral fitness  
421 and/or reporter gene expression, we examined the viral fitness of rSARS-CoV-  
422 2/mCherry-Nluc in cultured cells by assessing growth kinetics and compared them to  
423 those of rSARS-CoV-2 expressing single reporter gene (e.g. rSARS-CoV-2/mCherry  
424 and rSARS-CoV-2/Nluc) or rSARS-CoV-2/WT (**Figure 2A**). Vero E6 cells were infected  
425 at an MOI of 0.01 and viral titers in cell culture supernatants were quantified at different  
426 time points. No significant difference in replication kinetics were found between all the  
427 indicated viruses, except for rSARS-CoV-2/Nluc, which replicated slightly slower  
428 (**Figure 2A**). Conversely, rSARS-CoV-2/mCherry-Nluc reached a high titer of  $10^7$   
429 PFU/ml by 24-48 hpi like rSARS-CoV-2/WT and rSARS-CoV-2/mCherry, suggesting that  
430 the expression of the double reporter fused mCherry-Nluc gene did not affect viral  
431 fitness in Vero E6 cells (**Figure 2A**). In parallel, Nluc and mCherry expression were  
432 evaluated over a period of 96 h by either assessing Nluc activity in cell culture  
433 supernatants (**Figure 2B**) or by fluorescence microscopy (**Figure 2C**). Vero E6 cells  
434 were similarly infected (MOI 0.01) and Nluc activity in cell culture supernatants were  
435 quantified at different time points. We found Nluc activity steadily increased beginning at  
436 12 hpi and peaked at 72 hpi, then decreased at 96 hpi (**Figure 2B**). No Nluc activity was

437 detected in cell culture supernatants from mock-infected or Vero E6 cells infected with  
438 rSARS-CoV-2/WT or rSARS-CoV-2/mCherry (**Figure 2B**). Similarly, mCherry  
439 expression was detected as early as 12 hpi and increased in a time dependent matter  
440 until 72 hpi (**Figure 2C**). At 96 hpi, mCherry expression was lightly reduced, which  
441 coincided with the decrease in Nluc activity and viral titers at the same time point most  
442 likely due to the cytopathic effect (CPE) caused by viral infection. As expected, no  
443 mCherry expression was detected in Vero E6 cells infected with rSARS-CoV-2/WT or  
444 rSARS-CoV-2/Nluc, or mock-infected (not shown). These results suggest that *in vitro*  
445 detection and replication of rSARS-CoV-2/mCherry-Nluc could be monitored and  
446 quantified based on the expression of either Nluc (**Figure 2B**) or mCherry (**Figure 2C**)  
447 reporter genes.

448 Next, plaque assays were conducted to further corroborate that all rSARS-CoV-  
449 2/mCherry-Nluc viral particles express both mCherry and Nluc reporter genes, and to  
450 evaluate plaque phenotype and compared them to that of rSARS-CoV-2 expressing  
451 individual reporter genes (rSARS-CoV-2/mCherry and rSARS-CoV-2/Nluc), and rSARS-  
452 CoV-2/WT (**Figure 2D**). When plaques were examined by fluorescence microscopy,  
453 mCherry-positive plaques were detected in cells infected with rSARS-CoV-2/mCherry  
454 and rSARS-CoV-2/mCherry-Nluc (**Figure 2D**). Then, Nluc-positive plaques were  
455 detected using an anti-Nluc specific Ab and FITC-conjugated secondary Ab, which only  
456 appeared in cells infected with rSARS-CoV-2/Nluc or rSARS-CoV-2/mCherry-Nluc  
457 (**Figure 2D**). Importantly, when viral plaques were immunostained with an anti-N protein  
458 Ab, they colocalized with mCherry- and/or Nluc-positive plaques (white arrows) in both  
459 Vero E6 cells infected with individual reporter-expressing rSARS-CoV-2/mCherry and

460 rSARS-CoV-2/Nluc, as well as in double reporter-expressing rSARS-CoV-2/mCherry-  
461 Nluc (**Figure 2D**), demonstrating that all rSARS-CoV-2 plaques contained the reporter  
462 gene(s). Although the overall plaque size phenotype did not vary between the different  
463 viruses, we did observe smaller plaques produced (amongst the normal sized plaques)  
464 in rSARS-CoV-2/mCherry-Nluc experiments (**Figure 2D**).

### 465 **A double reporter-based neutralization assay for the identification of SARS-CoV-2** 466 **neutralizing antibodies and antivirals**

467 To demonstrate the feasibility of implementing our rSARS-CoV-2/mCherry-Nluc to  
468 identify and characterize neutralizing Abs (NAbs) and antivirals, we developed a double  
469 reporter-based microneutralization assay using 1212C2 hMAb (**Figure 3A**) and  
470 remdesivir (**Figure 3B**), which are described and shown to neutralize or inhibit,  
471 respectively, SARS-CoV-2 (74, 75). The neutralization activity of 1212C2 was assessed  
472 by incubating the hMAb with the indicated rSARS-CoV-2 prior to infection of Vero E6  
473 cells, and quantifying Nluc activity in cell culture supernatants (**Figure 3A**, right panel)  
474 and mCherry expression (**Figure 3A**, middle panel) using a microplate reader at 24 hpi.  
475 As internal control, we conducted the microneutralization assay using immunostaining  
476 of rSARS-CoV-2/WT, as previously described (**Figure 3A**, left panel) (71). We  
477 determined the 50% neutralization concentration (NT<sub>50</sub>) of 1212C2 hMAb using  
478 sigmoidal dose-response curves. The NT<sub>50</sub> of 1212C2 hMAb against rSARS-CoV-  
479 2/mCherry (2.4 ng) and rSARS-CoV-2/mCherry-Nluc (2.7 ng) as determined by  
480 fluorescent mCherry expression were similar to that of rSARS-CoV-2/WT (3 ng) using a  
481 classical immunostaining assay, and those reported with the SARS-CoV-2 WA-1 natural  
482 isolate (46, 74). Moreover, NT<sub>50</sub> values of 1212C2 hMAb against rSARS-CoV-2/Nluc or

483 rSARS-CoV-2/mCherry-Nluc determined by Nluc expression (3.0 and 2.0 ng,  
484 respectively) were also comparable to those of rSARS-CoV-2/WT (3 ng). To determine  
485 whether rSARS-CoV-2/mCherry-Nluc could also be used to assess the effectiveness of  
486 antivirals, we quantified the Nluc activity (**Figure 3B**, right panel) and mCherry  
487 expression (**Figure 3B**, middle panel) in Vero E6 cells infected with the single and  
488 double reporter-expressing rSARS-CoV-2 in the presence of serial 3-fold dilutions of  
489 remdesivir. As before, we also included rSARS-CoV-2/WT infected cells stained with  
490 the MAb against the viral N protein as internal control (**Figure 3B**, left panel). Sigmoidal  
491 dose-response curves were developed from reporter expression values and used to  
492 calculate the 50% effective concentration ( $EC_{50}$ ). The  $EC_{50}$  values of remdesivir against  
493 the indicated viruses were similar to each other, regardless of whether the  
494 microneutralization assay used immunostaining (rSARS-CoV-2/WT, 2  $\mu$ M; left panel),  
495 fluorescence (rSARS-CoV-2/mCherry, 1.7  $\mu$ M; rSARS-CoV-2/mCherry-Nluc, 1.5  $\mu$ M;  
496 middle panel), or luciferase (rSARS-CoV-2/Nluc, 1.4  $\mu$ M; rSARS-CoV-2/mCherry-Nluc,  
497 1.5  $\mu$ M; right panel) (**Figure 3B**). Overall, these results demonstrate the feasibility of  
498 using the rSARS-CoV-2 expressing both mCherry and Nluc reporter genes to reliably  
499 and quickly evaluate the neutralizing and inhibitory properties of NABs and/or antivirals,  
500 respectively, against SARS-CoV-2 based on mCherry and/or Nluc expression,  
501 respectively.

### 502 **Characterization of rSARS-CoV-2/mCherry-Nluc in K18 hACE2 transgenic mice**

503 Next, we characterized the pathogenicity and ability of rSARS-CoV-2/mCherry-Nluc  
504 to replicate in K18 hACE2 transgenic mice using rSARS-CoV-2 expressing individual  
505 fluorescent and bioluminescent reporter genes (rSARS-CoV-2/mCherry and rSARS-

506 CoV-2/Nluc, respectively), and rSARS-CoV-2/WT as internal control. One group of mice  
507 was infected with a mixture of rSARS-CoV-2/mCherry and rSARS-CoV-2/Nluc. To  
508 assess pathogenicity, groups of K18 hACE2 transgenic mice (n=4/group) were mock-  
509 infected or infected with  $10^5$  PFUs of the indicated viruses and changes in body weight  
510 (**Figure 4A**) and survival (**Figure 4B**) were monitored for 12 DPI. All mice infected with  
511 rSARS-CoV-2 rapidly lost body weight and succumbed to viral infection (**Figures 4A**  
512 **and 4B**, respectively). Most importantly, the virulence of rSARS-CoV-2/mCherry-Nluc  
513 was shown to be identical to that of our previously reporter viruses expressing individual  
514 mCherry or Nluc (46), or rSARS-CoV-2/WT (71, 76). These data indicate that  
515 expression of the fusion of mCherry and Nluc from rSARS-CoV-2/mCherry-Nluc does  
516 not result in viral attenuation in K18 hACE2 transgenic mouse model as compared to  
517 rSARS-CoV-2/WT.

#### 518 **Tracking viral dynamics of rSARS-CoV-2/mCherry-Nluc infection and** 519 **pathogenesis in K18 hACE2 transgenic mice**

520 Since our rSARS-CoV-2/mCherry-Nluc expresses both fluorescent (mCherry) and  
521 luciferase (Nluc) reporter genes, we sought to demonstrate the advantage of using this  
522 newly double reporter-expressing rSARS-CoV-2/mCherry-Nluc to track viral replication  
523 in live animals. Thus, K18 hACE2 transgenic mice were mock-infected or infected with  
524  $10^5$  PFU of the indicated rSARS-CoV-2 reporter viruses intranasally and Nluc was  
525 monitored at 1, 2, 4, and 6 DPI (**Figure 5A**). In mice infected with rSARS-CoV-2/Nluc or  
526 rSARS-CoV-2/mCherry-Nluc, or co-infected at the same time with rSARS-CoV-2/Nluc  
527 and rSARS-CoV-2/mCherry, we detected Nluc signal as early as 1 DPI, which  
528 increased over time (**Figure 5A**). Since IVIS was conducted in the same mouse, viral

529 replication and distribution was followed over time (**Figure 5A**) and bioluminescence  
530 intensity around the chest area of the mice was measured in flux (**Figure 5B**). As  
531 expected, Nluc expression increased over time until mice succumbed to SARS-CoV-2  
532 infection, consistent with previous literature, including ours (45). Notably, and as  
533 expected based on the IVIS (**Figure 5A**), Nluc expression was only readily detected in  
534 K18 hACE2 transgenic mice infected with rSARS-CoV-2/Nluc, rSARS-CoV-2/mCherry-  
535 Nluc, or co-infected with both, rSARS-CoV-2/mCherry and rSARS-CoV-2/Nluc (**Figure**  
536 **5B**). No significant differences in flux were observed between the groups of mice  
537 infected with the Nluc-expressing rSARS-CoV-2 mutants (**Figure 5B**).

538 As luciferase and fluorescence proteins have different properties and could  
539 potentially reveal different readouts as surrogate indicators of viral infection, we next  
540 determined and compared Nluc and mCherry expression during infection *in vivo*. Thus,  
541 K18 hACE2 transgenic mice (n=4) were mock-infected or infected with rSARS-CoV-  
542 2/WT, rSARS-CoV-2/mCherry, rSARS-CoV-2/Nluc, rSARS-CoV-2/mCherry-Nluc, or co-  
543 infected with rSARS-CoV-2/mCherry and rSARS-CoV-2/Nluc, then on 2 and 4 DPI, Nluc  
544 activity in the entire mouse (**Figures 6A and 6B**) and mCherry expression of whole  
545 lungs (**Figures 6C and 6D**) were determined, including the gross pathology score  
546 (**Figure 6E**). Like our previous results (**Figure 5**), an increase in Nluc expression from 2  
547 to 4 DPI was observed in K18 hACE2 transgenic mice infected with rSARS-CoV-2/Nluc,  
548 rSARS-CoV-2/mCherry-Nluc, or co-infected with rSARS-CoV-2/mCherry and rSARS-  
549 CoV-2/Nluc (**Figures 6A**). These results were further confirmed when we determined  
550 the flux in the *in vivo* imaged mice (**Figures 6B**). After quantifying Nluc expression, the  
551 lungs from mock- and rSARS-CoV-2-infected K18 hACE2 transgenic mice were excised

552 and imaged in the IVIS to determine and quantify mCherry expression (**Figures 6C and**  
553 **6D**, respectively). We only observed detectable levels of mCherry expression in the  
554 lungs of K18 hACE2 transgenic mice infected with rSARS-CoV-2/mCherry, rSARS-coV-  
555 2/mCherry-Nluc, or co-infected with both rSARS-CoV-2/mCherry and rSARS-coV-  
556 2/Nluc (**Figures 6C and 6D**). Notably, levels of mCherry expression, like those of Nluc  
557 were comparable in the lungs of K18 hACE2 transgenic mice infected with the double  
558 reporter-expressing rSARS-CoV-2/mCherry-Nluc than those infected with the single  
559 rSARS-CoV-2/Nluc, or co-infected with rSARS-CoV-2/mCherry and rSARS-CoV-2/Nluc  
560 (**Figures 6C and 6D**). Correlating with *in vivo* and *ex vivo* imaging of the lungs, gross  
561 lung pathology scores were comparable in all rSARS-CoV-2-infected K18 hACE2  
562 transgenic mice and more significant at 4 DPI (**Figure 6E**).

563 Both Nluc activity and viral titers peaked at 2 DPI in the nasal turbinate of mice  
564 infected with rSARS-CoV-2/Nluc, rSARS-CoV-2/mCherry-Nluc, or co-infected with  
565 rSARS-CoV-2/mCherry and rSARS-CoV-2/Nluc (**Figures 7A and 7B**, left panels)  
566 However, in the lungs, Nluc activity remained the same at 2 and 4 DPI, while viral titers  
567 decreased at 4 DPI as compared to 2 DPI (**Figures 7A and 7B**, middle panels). Nluc  
568 activity in brain homogenates was only evident in the samples from mice infected with  
569 rSARS-CoV-2/Nluc, rSARS-CoV-2/mCherry-Nluc, or both rSARS-CoV-2/mCherry and  
570 rSARS-CoV-2/Nluc and signals increased in a time dependent matter (**Figure 7A**, right  
571 panel). Consistent with previous studies, we were only able to detect SARS-CoV-2 in  
572 the brain of two of the four mice infected with rSARS-CoV-2/mCherry-Nluc at 4 DPI  
573 (**Figure 7B**, right panel) (45). Altogether, these findings demonstrate the feasibility to  
574 asses viral infection *in vivo* in the entire mice by bioluminescence (Nluc), and *ex vivo* in



575 the lungs of infected mice by fluorescence (mCherry) with our double reporter-  
576 expressing rSARS-CoV-2/mCherry-Nluc and that the mCherry-Nluc fusion does not  
577 have a significant impact in the pathogenesis and replication of the virus in K18 hACE2  
578 transgenic mice, showing similar levels of Nluc or mCherry reporter gene expression  
579 than those of rSARS-CoV-2 expressing individual bioluminescence or fluorescence  
580 proteins. Notably, viral titers of rSARS-CoV-2 mCherry-Nluc in the nasal turbinate and  
581 lungs were comparable to those of a rSARS-CoV-2/WT.

### 582 **Assessment of SARS-CoV-2 infection and transmission in golden Syrian** 583 **hamsters**

584 To demonstrate the feasibility of using our double reporter rSARS-CoV-2/mCherry-  
585 Nluc to assess viral replication and transmission, golden Syrian hamsters (n=4) were  
586 mock-infected or infected with  $10^5$  PFU/hamster of rSARS-CoV-2/mCherry-Nluc. The  
587 day after infection, non-infected naïve contact hamsters were placed in the same cage  
588 with infected hamsters. On 2, 4, and 6 DPI Nluc expression in the entire hamsters were  
589 evaluated by IVIS, like in our previous studies using K18 hACE2 transgenic mice.  
590 Infected hamsters presented detectable levels of Nluc expression in both the nasal  
591 turbinate and lungs at 2 and 4 DPI that decreased at 6 DPI (**Figure 8A**). In contrast,  
592 contact hamsters had little to no Nluc signal on 2 DPI that drastically increased on 4 and  
593 6 DPI (**Figure 8A**). The temporal and spatial differences in Nluc signal between  
594 originally infected and contact hamsters is most likely due to the route of  
595 transmission/infection and the time frame in which the contact hamsters were exposed  
596 to the originally infected hamsters. These initial IVIS results were further confirmed by  
597 quantification of bioluminescence in hamsters (**Figure 8B**) that showed a decrease in

598 flux in infected hamsters from 2 to 6 DPI and an increase from 2 to 4 DPI and then  
599 decreased on 6 DPI in contact hamsters (**Figure 8B**). Subsequently, lungs were  
600 excised and imaged in the IVIS for Nluc and mCherry expression (**Figure 8C**). Nluc and  
601 mCherry levels of expression correlate between them and with that observed by IVIS in  
602 the whole hamster, revealing a time-dependent effect in reporter expression in both  
603 infected and contact hamsters that correlate with the levels observed by IVIS (**Figure**  
604 **8D**). Gross pathology scores in the lungs of infected and contact hamsters were  
605 determined from brightfield images with increased scores over time in both infected and  
606 contact animals (**Figure 8E**).

607 Finally, nasal turbinate and lungs from mock and originally infected or contact  
608 hamsters were processed to determine Nluc activity (**Figure 9A**) and viral titers (**Figure**  
609 **9B**). In the nasal turbinate of originally infected hamsters, both Nluc activity and viral  
610 titers decreased from 2 to 6 DPI, while in contact hamsters, a time-dependent increase  
611 was observed (**Figures 9A and 9B**, respectively). A similar trend between Nluc signal  
612 and viral titers were observed in the lungs of originally infected and contact hamsters.  
613 Notably, Nluc signal and viral titers from both groups of infected and contact hamsters  
614 correlated with bioluminescence intensity from whole animals and excised lungs  
615 (**Figure 8**). Based on these results with rSARS-CoV-2/mCherry-Nluc, viral infection can  
616 be monitored in hamsters solely using reporter expression that correlates well with  
617 levels of viral replication. Moreover, rSARS-CoV-2 transmission from originally infected  
618 to contact hamsters can be easily tracked *in vivo* in the whole animal or *ex vivo* in the  
619 lungs (**Figure 8**), and results correlate with those of viral replication (**Figure 9**).

620

621  
622  
623  
624  
625  
626  
627  
628  
629  
630  
631  
632  
633  
634  
635  
636  
637  
638  
639  
640  
641  
642  
643

**DISCUSSION**

Replication-competent, reporter-expressing, recombinant viruses have been previously shown to represent an excellent approach to study, among others, viral infection, replication, pathogenesis, and transmission (21-31). We and others have described the feasibility of generating rSARS-CoV-2 expressing reporter genes encoding either fluorescent or luciferase proteins (38, 45, 46, 48, 49). These reporter-expressing replication-competent rSARS-CoV-2 can be used to assess the prophylactic activity of vaccines and/or the therapeutic potential of NAbs or antivirals (47, 71). Moreover, these rSARS-CoV-2 expressing fluorescent or luciferase proteins represent an excellent option to study the biology of SARS-CoV-2 in cultured cells and/or in

644 validated small animals of infection (46, 47, 49). Moreover, we have described a new  
645 approach to express reporter genes from the locus of the viral N protein using a 2A  
646 autoproteolytic system where levels of fluorescent or luciferase expression are higher  
647 than those where the reporter gene substitutes the viral ORF7a (45, 46). This new 2A  
648 strategy to express the reporter gene from the viral N protein locus does not require  
649 deleting the viral ORF7a (45, 46). However, these previously described reporter-  
650 expressing replication-competent rSARS-CoV-2 only express a single fluorescent or a  
651 luciferase protein and, therefore, their experimental applications are limited to the  
652 properties of one specific reporter gene and available equipment (45, 46).

653 Using our previously described BAC-based reverse genetics (21, 59), we generated  
654 a rSARS-CoV-2 expressing a fusion of the fluorescent mCherry protein to the  
655 bioluminescence Nluc protein (rSARS-CoV-2/mCherry-Nluc) upstream of the viral N  
656 protein separated by the PTV-1 2A autoproteolytic cleavage site, thereby allowing  
657 separate expression of the mCherry-Nluc fusion and the viral N protein (45, 46).  
658 Expression of both reporter genes was validated by fluorescence microscopy (mCherry)  
659 or by luciferase activity with a microplate reader (Nluc). We further confirmed reporter  
660 expression by Western blot, where a specific band was detected for the mCherry-Nluc  
661 fusion polyprotein. In cell culture, rSARS-CoV-2/mCherry-Nluc displayed growth kinetics  
662 similar to those of rSARS-CoV-2 expressing individual mCherry (rSARS-CoV-  
663 2/mCherry) or Nluc (rSARS-CoV-2/Nluc), or a rSARS-CoV-2 lacking reporter genes  
664 (rSARS-CoV-2/WT). Likewise, the plaque phenotype of the novel rSARS-CoV-  
665 2/mCherry-Nluc were similar in size to those of rSARS-CoV-2/mCherry, rSARS-CoV-  
666 2/Nluc, or rSARS-CoV-2/WT but only rSARS-CoV-2/mCherry-Nluc had detectable

667 levels of expression of both reporter genes. Importantly, levels of mCherry or Nluc  
668 reporter expression correlated with the levels of viral replication, further supporting the  
669 concept of reporter genes being a valid surrogate to study viral infection.

670 Based on the advantages of using a rSARS-CoV-2 expressing both a fluorescent  
671 and a bioluminescence protein over those expressing either fluorescence or luciferase  
672 reporter genes, we developed a bireporter-based microneutralization assay to identify  
673 and characterize NAbs as well as antivirals. Importantly,  $NT_{50}$  (NAbs) and  $EC_{50}$   
674 (antivirals) values obtained in bireporter-based microneutralization assays using either  
675 fluorescence or luciferase signal were comparable to those obtained with rSARS-CoV-2  
676 expressing individual mCherry (rSARS-CoV-2/mCherry) or Nluc (rSARS-CoV-2/Nluc)  
677 reporter genes, or rSARS-CoV-2/WT, and those reported previously in the literature (24,  
678 45, 46, 48). Overall, the bireporter rSARS-CoV-2 represents an excellent option in  
679 circumstances where fluorescence or luciferase is negated by the properties of an  
680 antiviral drug (such as fluorescing chemical entities in certain small molecule  
681 compounds) or the host cell being studied (46, 71). Moreover, although in this report the  
682 bireporter-based microneutralization assay was performed in 96-well plates, it can be  
683 easily adapted to a 384-well format for high-throughput screenings (HTS) to identify  
684 NAbs or antivirals using a double reporter screening approach based on expression of  
685 both fluorescent mCherry and luciferase Nluc. In this instance, having two reporters  
686 allows HTS to have the option to use either reporters, or both, to further validate  
687 neutralization results.

688 One of the major limitations of recombinant viruses expressing reporter genes is  
689 their potential attenuation *in vivo* (39). To assess whether expression of mCherry fused

690 to Nluc affected SARS-CoV-2 replication *in vivo*, we infected K18 hACE2 transgenic  
691 mice and golden Syrian hamsters with rSARS-CoV-2/mCherry-Nluc. Despite encoding a  
692 fusion of two reporter genes from the locus of the viral N protein, rSARS-CoV-  
693 2/mCherry-Nluc displayed similar virulence as determined by changes in body weight  
694 and survival in K18 hACE2 transgenic mice as rSARS-CoV-2 expressing individual  
695 fluorescent (rSARS-CoV-2/mCherry) or luciferase genes (rSARS-CoV-2/Nluc), or  
696 rSARS-CoV-2/WT. Importantly we traced viral infection in the same animal over a  
697 period of 6 days based on Nluc expression. We were able to detect both luciferase and  
698 fluorescent expression in the lungs of mice infected with rSARS-CoV-2/mCherry-Nluc;  
699 and mCherry or Nluc expression levels in the lungs of infected mice were comparable to  
700 those observed in mice infected with rSARS-CoV-2/mCherry or rSARS-CoV-2/Nluc, or  
701 co-infected with both rSARS-CoV-2/mCherry and rSARS-CoV-2/Nluc, or rSARS-CoV-  
702 2/WT. Notably, rSARS-CoV-2/mCherry-Nluc replicated in the nasal turbinate, lungs, and  
703 brain of infected K18 hACE2 transgenic mice to levels comparable to recombinant  
704 viruses expressing individual reporter genes (rSARS-CoV-2/mCherry or rSARS-CoV-  
705 2/Nluc) and those of rSARS-CoV-2/WT. Similar results were also observed in the  
706 golden Syrian hamster model of SARS-CoV-2 infection and transmission (21, 72).  
707 Importantly, in the case of hamsters, we were able to track viral infection and  
708 transmission in infected and contact hamsters, respectively, demonstrating the  
709 feasibility of using our double reporter-expressing rSARS-CoV-2/mCherry-Nluc in  
710 transmission studies in hamsters.

711 In summary, we have generated a rSARS-CoV-2 expressing simultaneously two  
712 reporter genes that is suitable for multiple experimental applications currently not

713 available with the use of rSARS-CoV-2 expressing a single fluorescent or luciferase  
714 reporter gene. This rSARS-CoV-2/mCherry-Nluc virus is, to our knowledge, the first  
715 replication-competent rSARS-CoV-2 stably expressing two reporter genes. With rSARS-  
716 CoV-2/mCherry-Nluc, mCherry could be used to identify infected cells *in vitro* while Nluc  
717 represents a better option to provide quantify levels of infection. In animal studies,  
718 mCherry is a superior option for *ex vivo* imaging and for the identification of infected  
719 cells (45). Moreover, by combining two recombinant viruses expressing two different  
720 fluorescent proteins, one could evaluate the antiviral or neutralizing activity of antivirals  
721 or antibodies, respectively, against multiple viruses by looking at different fluorescent  
722 expression (47). In contrast, Nluc is the only viable option for *in vivo* imaging using  
723 entire animals (45). Importantly, both reporter genes can be used as valid surrogates of  
724 viral infection since their levels of expression correlate with those of viral replication,  
725 demonstrating the feasibility of using this novel bireporter-expressing rSARS-CoV-2 to  
726 study the biology of SARS-CoV-2 *in vitro* and/or *in vivo*. The feasibility of generating  
727 rSARS-CoV-2 expressing a fusion of two reporter genes demonstrates the plasticity of  
728 the viral genome to express large ORFs from the locus of the viral N protein. Moreover,  
729 the robust levels of reporter gene expression obtained using this 2A autoproteolytic  
730 approach and the feasibility of expressing foreign genes without the need of removing a  
731 viral protein (e.g. ORF7a) represent an ideal option for the use of rSARS-CoV-  
732 2/mCherry-Nluc to study viral infection, pathogenesis and transmission, including newly  
733 identified VoC.

734

735

736  
737  
738  
739  
740  
741  
742  
743  
744  
745  
746  
747  
748  
749  
750

751 **ACKNOWLEDGEMENTS**

752 We are grateful to Dr. Thomas Moran at The Icahn School of Medicine at Mount  
753 Sinai for providing the SARS-CoV cross-reactive 1C7C7 N protein MAb. Research on  
754 SARS-CoV-2 in L.M-S laboratory was partially supported by grants W81XWH2110103  
755 and W81XWH2110095 from the Department of Defense (DoD) Peer Reviewed Medical  
756 Research Program (PRMRP); 1R43AI165089-01, 1R01AI161363-01 and  
757 1R01AI161175-01A1 from the National Institute of Health (NIH); by the Center for  
758 Research on Influenza Pathogenesis (CRIP), one of the National Institute of Allergy and



759 Infectious Diseases (NIAID) funded Centers of Excellence for Influenza Research and  
760 Response (CEIRR; contract # 75N93021C00014); the San Antonio Partnership for  
761 Precision Therapeutics, and the San Antonio Medical Foundation. Research in L.M-S  
762 was also partially supported by NIH R01AI145332, R01AI142985, R01AI141607; and by  
763 the DoD W81XWH1910496.

764

765

766

767

768

769

770

771

772

773

#### 774 **FIGURE LEGENDS**

775 **Figure 1. Generation of a bireporter rSARS-CoV-2 expressing mCherry and Nluc**  
776 **(rSARS-CoV-2/mCherry-Nluc). A) Schematic representation of the rSARS-CoV-**  
777 **2/mCherry-Nluc viral genome:** SARS-CoV-2 structural, non-structural, and accessory  
778 open reading frame (ORF) proteins are indicated in white boxes. mCherry (red), Nluc  
779 (blue) and the PTV-1 2A autoproteolytic sequence (black) were inserted in front of the  
780 viral N protein. **B) mCherry expression and immunofluorescence assays:** Vero E6  
781 cells ( $1.2 \times 10^6$  cells/well, 6-well format, triplicates) were mock-infected or infected (MOI

782 0.01) with rSARS-CoV-2 WT, rSARS-CoV-2/mCherry, rSARS-CoV-2/Nluc, or rSARS-  
783 CoV-2/mCherry-Nluc. Cells were fixed in 10% neutral buffered formalin 24 hpi before  
784 directly visualizing mCherry expression under a fluorescence microscope or the viral N  
785 protein using a specific 1C7C7 MAb. Cell nuclei were stained with DAPI.  
786 Representative images are shown. Scale bars = 100  $\mu$ m. Magnification = X20. **C)**  
787 **Western blots:** Vero E6 cells ( $1.2 \times 10^6$  cells/well, 6-well format, triplicates) were mock-  
788 infected or infected (MOI 0.01) with rSARS-CoV-2 WT, rSARS-CoV-2/mCherry, rSARS-  
789 CoV-2/Nluc, or rSARS-CoV-2/mCherry-Nluc. At 24 hpi, cells were collected and protein  
790 expression in cell lysates were evaluated by Western blot using specific antibodies  
791 against SARS-CoV-2 N protein, or the mCherry and Nluc reporter proteins. Tubulin was  
792 included as a loading control. The molecular mass of proteins is indicated in kilodaltons  
793 (kDa) on the left. **D) Deep sequencing analysis of reporter-expressing rSARS-CoV-**  
794 **2:** The non-reference allele frequency of rSARS-CoV-2/mCherry (top), rSARS-CoV-  
795 2/Nluc (middle), and rSARS-CoV-2/mCherry-Nluc (bottom) was calculated by  
796 comparing the short reads to the respective reference SARS-CoV-2 WA-1 viral genome  
797 (MN985325.1). Non-reference alleles present in less than 10% of reads are not shown  
798 (dotted line) and the non-reference allele frequency that is greater than 10% is  
799 indicated.

800 **Figure 2. *In vitro* characterization of the bireporter rSARS-CoV-2/mCherry-Nluc**  
801 **virus. A) Viral growth kinetics:** Viral titers (PFU/ml) in the cell culture supernatants of  
802 Vero E6 cells ( $1.2 \times 10^6$  cells/well, 6-well format, triplicates) infected (MOI 0.01) with  
803 rSARS-CoV-2 WT (WT), rSARS-CoV-2/mCherry (mCherry), rSARS-CoV-2/Nluc (Nluc),  
804 or rSARS-CoV-2/mCherry-Nluc (mCherry-Nluc) at the indicated time points post-

805 infection were determined by plaque assay. Data represents the mean values and SD of  
806 triplicates. LOD, limit of detection. **B) Nluc activity:** Nluc activity in the cell culture  
807 supernatants obtained from the experiment in panel A is represented in relative light  
808 units (RLU). **C) mCherry expression kinetics:** Vero E6 cells ( $1.2 \times 10^6$  cells/well, 6-  
809 well format, triplicates) were infected (MOI 0.01) with rSARS-CoV-2 WT, rSARS-CoV-  
810 2/mCherry, rSARS-CoV-2/Nluc, or rSARS-CoV-2/mCherry-Nluc and mCherry  
811 expression was directly visualized under a fluorescence microscope at the indicated  
812 times post-infection. Representative images are shown. Scale bars = 300  $\mu$ m.  
813 Magnification = X10. **D) Plaque phenotype:** Viral plaques from Vero E6 cells ( $2 \times 10^5$   
814 cells/well, 24-well plate format, triplicates) infected with rSARS-CoV-2 WT, rSARS-CoV-  
815 2/mCherry, rSARS-CoV-2/Nluc, or rSARS-CoV-2/mCherry-Nluc at 3 DPI were observed  
816 under a fluorescence imaging system (first column, red filter), fluorescently stained with  
817 an antibody against Nluc (second column, FITC), or immunostaining with an antibody  
818 against the viral N protein (third column, N). White arrowheads depict the overlapping  
819 signal of mCherry fluorescence (left), Nluc bioluminescence (middle), and  
820 immunostaining of the viral N protein (right) in Vero E6 cells infected with rSARS-CoV-  
821 2/mCherry, rSARS-CoV-2/Nluc, or rSARS-CoV-2/mCherry-Nluc. ns, not significant. \*,  $P$   
822 < 0.05; \*\*,  $P$  < 0.01.

823 **Figure 3. Bireporter-based microneutralization assay to identify NABs and**  
824 **antivirals against SARS-CoV-2. A) A bireporter microneutralization assay to**  
825 **identify NABs:** Three-fold serial dilutions of the SARS-CoV-2 1212C2 hMAb (starting  
826 concentration of 500 ng) were prepared in post-infection media and incubated with 100-  
827 200 PFUs/well of rSARS-CoV-2 WT (WT), rSARS-CoV-2/mCherry (mCherry), rSARS-

828 CoV-2/Nluc (Nluc), or rSARS-CoV-2/mCherry-Nluc (mCherry-Nluc) for 1 h at  
829 RT. Vero E6 cells (96-well plate format,  $4 \times 10^4$  cells/well, quadruplicates) were infected  
830 and incubated with the virus-antibody mixture at  $37^\circ\text{C}$  for 24 h. Viral neutralization was  
831 determined by immunostaining using an anti-N protein MAb (1C7C7) for rSARS-CoV-  
832 2/WT (left) or by fluorescence expression for rSARS-CoV-2/mCherry and rSARS-CoV-  
833 2/mCherry-Nluc (middle), or bioluminescence for rSARS-CoV-2/Nluc and rSARS-CoV-  
834 2/mCherry-Nluc (right) using a microplate reader. The 50% neutralization titer ( $\text{NT}_{50}$ )  
835 was calculated using sigmoidal dose-response curves on GraphPad Prism. Viral  
836 neutralization was normalized to wells containing infected cells without the 1212C2  
837 hMAb. The dotted line indicates 50% virus inhibition. Data are represented by the mean  
838 values and SD of quadruplicates. **B) A bireporter microneutralization assay to**  
839 **assess antivirals:** Vero E6 cells (96-well plate format,  $4 \times 10^4$  cells/well,  
840 quadruplicates) were infected with 100-200 PFUs of rSARS-CoV-2/WT, or reporter  
841 viruses expressing mCherry, Nluc, or mCherry-Nluc. After 1 h viral absorption, cells  
842 were incubated in post-infection media containing 3-fold serial dilutions of remdesivir  
843 (starting concentration of  $100 \mu\text{M}$ ). Viral inhibition was determined by immunostaining  
844 using an anti-N protein MAb (1C7C7) for rSARS-CoV-2/WT (left) or by fluorescence  
845 expression for rSARS-CoV-2/mCherry and rSARS-CoV-2/mCherry-Nluc (middle), or  
846 bioluminescence for rSARS-CoV-2/Nluc and rSARS-CoV-2/mCherry-Nluc (right) using a  
847 microplate reader. The 50% effective concentration ( $\text{EC}_{50}$ ) was calculated using  
848 sigmoidal dose-response curves on GraphPad Prism. Viral inhibition was normalized to  
849 wells containing infected cells without remdesivir. The dotted line indicates the 50%  
850 virus inhibition. The data is represented by the mean values and SD of quadruplicates.

851 **Figure 4. Virulence of rSARS-CoV-2/mCherry-Nluc in K18 hACE2 transgenic mice:**  
852 Four-to-six-weeks-old female K18 hACE2 transgenic mice (n=4) were mock-infected or  
853 intranasally inoculated with  $10^5$  PFU/mouse of rSARS-CoV-2 WT (WT), rSARS-CoV-  
854 2/mCherry (mCherry), rSARS-CoV-2/Nluc (Nluc), or the bireporter rSARS-CoV-  
855 2/mCherry-Nluc (mCherry-Nluc). A group of four-to-six-weeks-old female K18 hACE2  
856 transgenic mice (n=4) were also co-infected with rSARS-CoV-2/mCherry and rSARS-  
857 CoV-2/Nluc (mCherry + Nluc). Body weight loss (**A**) and survival (**B**) of mice were  
858 monitored for 12 days after viral infection.

859 **Figure 5. *In vivo* kinetics of rSARS-CoV-2/mCherry-Nluc in K18 hACE2 transgenic**  
860 **mice:** Four-to-six-weeks-old female K18 hACE2 transgenic mice (n=4) were mock-  
861 infected or infected intranasally with  $10^5$  PFU/mouse of rSARS-CoV-2 WT, rSARS-CoV-  
862 2/mCherry, rSARS-CoV-2/Nluc, rSARS-CoV-2/mCherry + rSARS-CoV-2/Nluc, or with  
863 rSARS-CoV-2/mCherry-Nluc (mCherry-Nluc). Nluc activity in the whole mouse at the  
864 indicated DPI was evaluated with an Ami HT *in vivo* imaging system. Representative  
865 images of the same mouse at 1, 2, 4, and 6 DPI are shown (**A**). Means and SD of the  
866 radiance (number of photons per second per square centimeter per steradian  
867 [p/second/cm<sup>2</sup>/sr]) and bioluminescence (total flux [log<sub>10</sub> photons per second (p/s)] over  
868 each mouse are shown) (**B**). ns, not significant. \*\*\*,  $P < 0.001$ .

869 **Figure 6. *In vivo* bioluminescence and *ex vivo* fluorescence in K18 hACE2**  
870 **transgenic mice infected with rSARS-CoV-2/mCherry-Nluc. A) *In vivo* Nluc**  
871 **expression:** Nluc activity in live mice (n=4) mock-infected or infected ( $10^5$  PFU/mouse)  
872 with rSARS-CoV-2 WT, rSARS-CoV-2/mCherry, rSARS-CoV-2/Nluc, rSARS-CoV-  
873 2/mCherry + rSARS-CoV-2/Nluc, or the bireporter rSARS-CoV-2/mCherry-Nluc

874 (mCherry-Nluc) were determined on 2 and 4 DPI using the Ami HT IVIS. A  
875 representative image of a mouse per time point is shown. **B) Quantification of Nluc**  
876 **signal:** Means and SD of the radiance (number of photons per second per square  
877 centimeter per steradian [p/second/cm<sup>2</sup>/sr]) and bioluminescence (total flux [log<sub>10</sub>  
878 photons per second (p/s)] of mock and infected mice is shown. **C) Ex vivo mCherry**  
879 **expression:** Excised lungs from mock-infected or infected mice from panel A were  
880 monitored for mCherry fluorescent expression (FL, top) and bright field (BF, bottom) at 2  
881 and 4 DPI. Representative lung images from the same mouse used in panel A are  
882 shown. **D) Quantification of mCherry expression:** The mean values of mCherry  
883 signal around the regions of interest were normalized to the autofluorescence of mock-  
884 infected lungs at each time point and the fold changes in fluorescence were calculated.  
885 **E) Gross pathology score:** Pathology lesions, consolidation, congestion, and  
886 atelectasis, of excised lungs were measured using NIH ImageJ and represented as  
887 percentages of total lung surface area affected. ns, not significant. \*,  $P < 0.05$ ; \*\*\*,  $P <$   
888 0.001.

889 **Figure 7. Nluc activity and viral titers in tissue homogenates from infected K18**  
890 **hACE2 transgenic mice:** The nasal turbinate (left), lungs (middle), and brain (right) of  
891 four-to-six-weeks-old female K18 hACE2 transgenic mice (n=4) mock-infected or  
892 infected intranasally with 10<sup>5</sup> PFU/mouse of rSARS-CoV-2 WT, rSARS-CoV-2/mCherry,  
893 rSARS-CoV-2/Nluc, rSARS-CoV-2/mCherry + rSARS-CoV-2/Nluc, or the bireporter  
894 rSARS-CoV-2/mCherry-Nluc were collected after imaging on an Ami HT IVIS on 2 and 4  
895 DPI. After homogenization, Nluc activity (**A**) and viral titers (**B**) in tissue homogenates  
896 were determined on a microplate reader or by plaque assay, respectively. The results

897 are the mean values and SD. LOD, limit of detection. ns, not significant. nd, not  
898 detected. \*\*,  $P < 0.01$ ; \*\*\*,  $P < 0.001$ .

899 **Figure 8. *In vivo* bioluminescence and *ex vivo* fluorescence in golden Syrian**  
900 **hamsters infected with rSARS-CoV-2/mCherry-Nluc. A) *In vivo* Nluc expression:**  
901 Nluc activity in four-to-six-weeks-old female golden Syrian hamsters (n=4) mock-  
902 infected or infected with  $10^5$  PFU/hamster of rSARS-CoV-2/mCherry-Nluc were  
903 determined on 2, 4 and 6 DPI using the Ami HT IVIS. Contact animals were exposed to  
904 infected animals 1 DPI. A representative image of a hamster per time points and  
905 experimental condition is shown. **B) Quantification of Nluc signal:** Means and SD of  
906 the radiance (number of photons per second per square centimeter per steradian  
907 [p/second/cm<sup>2</sup>/sr]) and bioluminescence (total flux [log<sub>10</sub> photons per second (p/s)]) were  
908 quantified from whole hamsters after IVIS imaging. **C) *Ex vivo* mCherry and Nluc**  
909 **expression:** Excised lungs from mock-infected or infected golden Syrian hamsters from  
910 panel A were monitored for mCherry fluorescence (FL, top), Nluc signal (Nluc, middle),  
911 and bright field (BF, bottom) at 2, 4, and 6 DPI. Representative lung images from the  
912 same hamster used in panel A are shown. **D) Quantification of mCherry expression:**  
913 the mean values of mCherry signal around the regions of interest were normalized to  
914 the autofluorescence of mock-infected lungs at each time point and the fold changes in  
915 fluorescence were calculated. **E) Gross pathology score:** Pathological lesions,  
916 consolidation, congestion, and atelectasis, of excised lungs were measured using NIH  
917 ImageJ and represented as percentages of total lung surface area affected. ns, not  
918 significant. \*,  $P < 0.05$ ; \*\*\*,  $P < 0.001$ .

919 **Figure 9. Nluc activity and viral titers in golden Syrian hamster tissue**  
920 **homogenates infected with rSARS-CoV-2/mCherry-Nluc:** The nasal turbinate (left)  
921 and lungs (right) of four-to-six-weeks-old female golden Syrian hamsters (n=4) mock-  
922 infected or infected intranasally with  $10^5$  PFU/hamster of rSARS-CoV-2/mCherry-Nluc  
923 were collected after imaging on an Ami HT IVIS at 2 and 4 DPI. In addition, after 24 hpi,  
924 contact golden Syrian hamsters (n=4, contact) were added to the cages of infected  
925 animals. After homogenization, Nluc activity (**A**) and viral titers (**B**) in tissue  
926 homogenates were determined on a microplate reader or by plaque assay, respectively.  
927 Results are the means and SD. LOD, limit of detection. ns, not significant. nd, not  
928 detected. \*\*\*,  $P < 0.001$ .

929

930

931

932

933

934

935

936

937

## 938 **REFERENCES**

- 939 1. Zhu N, Zhang D, Wang W, Li X, Yang B, Song J, Zhao X, Huang B, Shi W, Lu R,  
940 Niu P, Zhan F, Ma X, Wang D, Xu W, Wu G, Gao GF, Tan W, China Novel



- 941            Coronavirus I, Research T. 2020. A Novel Coronavirus from Patients with  
942            Pneumonia in China, 2019. *N Engl J Med* 382:727-733.
- 943    2.        Dong E, Du H, Gardner L. 2020. An interactive web-based dashboard to track  
944            COVID-19 in real time. *Lancet Infect Dis* 20:533-534.
- 945    3.        Mizumoto K, Kagaya K, Zarebski A, Chowell G. 2020. Estimating the  
946            asymptomatic proportion of coronavirus disease 2019 (COVID-19) cases on  
947            board the Diamond Princess cruise ship, Yokohama, Japan, 2020. *Euro Surveill*  
948            25.
- 949    4.        Gudbjartsson DF, Helgason A, Jonsson H, Magnusson OT, Melsted P, Norddahl  
950            GL, Saemundsdottir J, Sigurdsson A, Sulem P, Agustsdottir AB, Eiriksdottir B,  
951            Fridriksdottir R, Gardarsdottir EE, Georgsson G, Gretarsdottir OS, Gudmundsson  
952            KR, Gunnarsdottir TR, Gylfason A, Holm H, Jensson BO, Jonasdottir A, Jonsson  
953            F, Josefsdottir KS, Kristjansson T, Magnusdottir DN, le Roux L, Sigmundsdottir  
954            G, Sveinbjornsson G, Sveinsdottir KE, Sveinsdottir M, Thorarensen EA,  
955            Thorbjornsson B, Löve A, Masson G, Jonsdottir I, Möller AD, Gudnason T,  
956            Kristinsson KG, Thorsteinsdottir U, Stefansson K. 2020. Spread of SARS-CoV-2  
957            in the Icelandic Population. *N Engl J Med* 382:2302-2315.
- 958    5.        Zaki AM, van Boheemen S, Bestebroer TM, Osterhaus AD, Fouchier RA. 2012.  
959            Isolation of a novel coronavirus from a man with pneumonia in Saudi Arabia. *N*  
960            *Engl J Med* 367:1814-20.
- 961    6.        de Wit E, van Doremalen N, Falzarano D, Munster VJ. 2016. SARS and MERS:  
962            recent insights into emerging coronaviruses. *Nat Rev Microbiol* 14:523-34.

- 963 7. Chen B, Tian EK, He B, Tian L, Han R, Wang S, Xiang Q, Zhang S, El Arnaout T,  
964 Cheng W. 2020. Overview of lethal human coronaviruses. *Signal Transduct*  
965 *Target Ther* 5:89.
- 966 8. Kahn JS. 2006. The widening scope of coronaviruses. *Curr Opin Pediatr* 18:42-7.
- 967 9. Peacock TP, Goldhill DH, Zhou J, Baillon L, Frise R, Swann OC, Kugathasan R,  
968 Penn R, Brown JC, Sanchez-David RY, Braga L, Williamson MK, Hassard JA,  
969 Staller E, Hanley B, Osborn M, Giacca M, Davidson AD, Matthews DA, Barclay  
970 WS. 2021. The furin cleavage site in the SARS-CoV-2 spike protein is required  
971 for transmission in ferrets. *Nat Microbiol* 6:899-909.
- 972 10. Johnson BA, Xie X, Bailey AL, Kalveram B, Lokugamage KG, Muruato A, Zou J,  
973 Zhang X, Juelich T, Smith JK, Zhang L, Bopp N, Schindewolf C, Vu M,  
974 Vanderheiden A, Winkler ES, Swetnam D, Plante JA, Aguilar P, Plante KS,  
975 Popov V, Lee B, Weaver SC, Suthar MS, Routh AL, Ren P, Ku Z, An Z, Debbink  
976 K, Diamond MS, Shi PY, Freiberg AN, Menachery VD. 2021. Loss of furin  
977 cleavage site attenuates SARS-CoV-2 pathogenesis. *Nature* 591:293-299.
- 978 11. Rudan I, Adeloye D, Sheikh A. 2022. COVID-19: vaccines, efficacy and effects  
979 on variants. *Curr Opin Pulm Med* 28:180-191.
- 980 12. Mabrouk MT, Huang WC, Martinez-Sobrido L, Lovell JF. 2022. Advanced  
981 Materials for SARS-CoV-2 Vaccines. *Adv Mater* 34:e2107781.
- 982 13. Wang M, Cao R, Zhang L, Yang X, Liu J, Xu M, Shi Z, Hu Z, Zhong W, Xiao G.  
983 2020. Remdesivir and chloroquine effectively inhibit the recently emerged novel  
984 coronavirus (2019-nCoV) in vitro. *Cell Res* 30:269-271.

- 985 14. Beigel JH, Tomashek KM, Dodd LE, Mehta AK, Zingman BS, Kalil AC, Hohmann  
986 E, Chu HY, Luetkemeyer A, Kline S, Lopez de Castilla D, Finberg RW, Dierberg  
987 K, Tapson V, Hsieh L, Patterson TF, Paredes R, Sweeney DA, Short WR,  
988 Touloumi G, Lye DC, Ohmagari N, Oh MD, Ruiz-Palacios GM, Benfield T,  
989 Fatkenheuer G, Kortepeter MG, Atmar RL, Creech CB, Lundgren J, Babiker AG,  
990 Pett S, Neaton JD, Burgess TH, Bonnett T, Green M, Makowski M, Osinusi A,  
991 Nayak S, Lane HC, Members A-SG. 2020. Remdesivir for the Treatment of  
992 Covid-19 - Final Report. *N Engl J Med* 383:1813-1826.
- 993 15. Jones BE, Brown-Augsburger PL, Corbett KS, Westendorf K, Davies J, Cujec  
994 TP, Wiethoff CM, Blackbourne JL, Heinz BA, Foster D, Higgs RE,  
995 Balasubramaniam D, Wang L, Zhang Y, Yang ES, Bidshahri R, Kraft L, Hwang  
996 Y, Žentelis S, Jepson KR, Goya R, Smith MA, Collins DW, Hinshaw SJ, Tycho  
997 SA, Pellacani D, Xiang P, Muthuraman K, Sobhanifar S, Piper MH, Triana FJ,  
998 Hendle J, Pustilnik A, Adams AC, Berens SJ, Baric RS, Martinez DR, Cross RW,  
999 Geisbert TW, Borisevich V, Abiona O, Belli HM, de Vries M, Mohamed A,  
1000 Dittmann M, Samanovic MI, Mulligan MJ, Goldsmith JA, Hsieh CL, Johnson NV,  
1001 et al. 2021. The neutralizing antibody, LY-CoV555, protects against SARS-CoV-2  
1002 infection in nonhuman primates. *Sci Transl Med* 13.
- 1003 16. Madhi SA, Baillie V, Cutland CL, Voysey M, Koen AL, Fairlie L, Padayachee SD,  
1004 Dheda K, Barnabas SL, Borhat QE, Briner C, Kwatra G, Ahmed K, Aley P,  
1005 Bhikha S, Bhiman JN, Borhat AE, du Plessis J, Esmail A, Groenewald M, Horne  
1006 E, Hwa SH, Jose A, Lambe T, Laubscher M, Malahleha M, Masenya M, Masilela  
1007 M, McKenzie S, Molapo K, Moultrie A, Oelofse S, Patel F, Pillay S, Rhead S,

1008 Rodel H, Rossouw L, Taoushanis C, Tegally H, Thombrayil A, van Eck S,  
1009 Wibmer CK, Durham NM, Kelly EJ, Villafana TL, Gilbert S, Pollard AJ, de Oliveira  
1010 T, Moore PL, Sigal A, et al. 2021. Efficacy of the ChAdOx1 nCoV-19 Covid-19  
1011 Vaccine against the B.1.351 Variant. *N Engl J Med* 384:1885-1898.

1012 17. Irfan N, Chagla Z. 2021. In South Africa, a 2-dose Oxford/AZ vaccine did not  
1013 prevent mild to moderate COVID-19 (cases mainly B.1.351 variant). *Ann Intern*  
1014 *Med* 174:JC50.

1015 18. Tegally H, Wilkinson E, Giovanetti M, Iranzadeh A, Fonseca V, Giandhari J,  
1016 Doolabh D, Pillay S, San EJ, Msomi N, Mlisana K, von Gottberg A, Walaza S,  
1017 Allam M, Ismail A, Mohale T, Glass AJ, Engelbrecht S, Van Zyl G, Preiser W,  
1018 Petruccione F, Sigal A, Hardie D, Marais G, Hsiao M, Korsman S, Davies M-A,  
1019 Tyers L, Mudau I, York D, Maslo C, Goedhals D, Abrahams S, Laguda-Akingba  
1020 O, Alisoltani-Dehkordi A, Godzik A, Wibmer CK, Sewell BT, Lourenço J,  
1021 Alcantara LCJ, Pond SLK, Weaver S, Martin D, Lessells RJ, Bhiman JN,  
1022 Williamson C, de Oliveira T. 2020. Emergence and rapid spread of a new severe  
1023 acute respiratory syndrome-related coronavirus 2 (SARS-CoV-2) lineage with  
1024 multiple spike mutations in South Africa. *medRxiv*  
1025 doi:10.1101/2020.12.21.20248640:2020.12.21.20248640.

1026 19. Andrews N, Stowe J, Kirsebom F, Toffa S, Rickeard T, Gallagher E, Gower C,  
1027 Kall M, Groves N, O'Connell AM, Simons D, Blomquist PB, Zaidi A, Nash S,  
1028 Iwani Binti Abdul Aziz N, Thelwall S, Dabrera G, Myers R, Amirthalingam G,  
1029 Gharbia S, Barrett JC, Elson R, Ladhani SN, Ferguson N, Zambon M, Campbell  
1030 CNJ, Brown K, Hopkins S, Chand M, Ramsay M, Lopez Bernal J. 2022. Covid-19

1031 Vaccine Effectiveness against the Omicron (B.1.1.529) Variant. *N Engl J Med*  
1032 doi:10.1056/NEJMoa2119451.

1033 20. Chenchula S, Karunakaran P, Sharma S, Chavan M. 2022. Current evidence on  
1034 efficacy of COVID-19 booster dose vaccination against the Omicron variant: A  
1035 systematic review. *J Med Virol* doi:10.1002/jmv.27697.

1036 21. Ye C, Chiem K, Park JG, Oladunni F, Platt RN, Anderson T, Almazan F, de la  
1037 Torre JC, Martinez-Sobrido L. 2020. Rescue of SARS-CoV-2 from a single  
1038 bacterial artificial chromosome. *bioRxiv* doi:10.1101/2020.07.22.216358.

1039 22. Avila-Perez G, Nogales A, Park JG, Vasquez DM, Dean DA, Barravecchia M,  
1040 Perez DR, Almazan F, Martinez-Sobrido L. 2020. In vivo rescue of recombinant  
1041 Zika virus from an infectious cDNA clone and its implications in vaccine  
1042 development. *Sci Rep* 10:512.

1043 23. Avila-Perez G, Park JG, Nogales A, Almazan F, Martinez-Sobrido L. 2019.  
1044 Rescue of Recombinant Zika Virus from a Bacterial Artificial Chromosome cDNA  
1045 Clone. *J Vis Exp* doi:10.3791/59537.

1046 24. Xie X, Muruato A, Lokugamage KG, Narayanan K, Zhang X, Zou J, Liu J,  
1047 Schindewolf C, Bopp NE, Aguilar PV, Plante KS, Weaver SC, Makino S, LeDuc  
1048 JW, Menachery VD, Shi PY. 2020. An Infectious cDNA Clone of SARS-CoV-2.  
1049 *Cell Host Microbe* 27:841-848 e3.

1050 25. Cai Y, Iwasaki M, Beitzel BF, Yú S, Postnikova EN, Cubitt B, DeWald LE,  
1051 Radoshitzky SR, Bollinger L, Jahrling PB, Palacios GF, de la Torre JC, Kuhn JH.  
1052 2018. Recombinant Lassa Virus Expressing Green Fluorescent Protein as a Tool

1053 for High-Throughput Drug Screens and Neutralizing Antibody Assays. *Viruses*  
1054 10.

1055 26. Nogales A, Perez DR, Santos J, Finch C, Martinez-Sobrido L. 2017. Reverse  
1056 Genetics of Influenza B Viruses. *Methods Mol Biol* 1602:205-238.

1057 27. Breen M, Nogales A, Baker SF, Martínez-Sobrido L. 2016. Replication-  
1058 Competent Influenza A Viruses Expressing Reporter Genes. *Viruses* 8.

1059 28. Engelhardt OG. 2013. Many ways to make an influenza virus--review of influenza  
1060 virus reverse genetics methods. *Influenza Other Respir Viruses* 7:249-56.

1061 29. Ujike M, Etoh Y, Urushiyama N, Taguchi F, Asanuma H, Enjuanes L, Kamitani  
1062 W. 2022. Reverse Genetics with a Full-Length Infectious cDNA Clone of Bovine  
1063 Torovirus. *J Virol* 96:e0156121.

1064 30. Amarilla AA, Sng JDJ, Parry R, Deerain JM, Potter JR, Setoh YX, Rawle DJ, Le  
1065 TT, Modhiran N, Wang X, Peng NYG, Torres FJ, Pyke A, Harrison JJ, Freney  
1066 ME, Liang B, McMillan CLD, Cheung STM, Guevara DJDC, Hardy JM, Bettington  
1067 M, Muller DA, Coulibaly F, Moore F, Hall RA, Young PR, Mackenzie JM, Hobson-  
1068 Peters J, Suhrbier A, Watterson D, Khromykh AA. 2021. A versatile reverse  
1069 genetics platform for SARS-CoV-2 and other positive-strand RNA viruses. *Nat*  
1070 *Commun* 12:3431.

1071 31. Feng M, Li L, Cheng R, Yuan Y, Dong Y, Chen M, Guo R, Yao M, Xu Y, Zhou Y,  
1072 Wu J, Ding XS, Zhou X, Tao X. 2021. Development of a Mini-Replicon-Based  
1073 Reverse-Genetics System for Rice Stripe Tenuivirus. *J Virol* 95:e0058921.

1074 32. Smith A, Rodriguez L, Ghouayel ME, Nogales A, Chamberlain JM, Sortino K,  
1075 Reilly E, Feng C, Topham DJ, Martinez-Sobrido L, Dewhurst S. 2019. A live-

1076 attenuated influenza vaccine (LAIV) elicits enhanced heterologous protection  
1077 when the internal genes of the vaccine are matched to the challenge virus. *J Virol*  
1078 doi:JV1.01065-19 [pii]  
1079 10.1128/JVI.01065-19.

1080 33. Rodriguez L, Blanco-Lobo P, Reilly EC, Maehigashi T, Nogales A, Smith A,  
1081 Topham DJ, Dewhurst S, Kim B, Martinez-Sobrido L. 2019. Comparative Study  
1082 of the Temperature Sensitive, Cold Adapted and Attenuated Mutations Present in  
1083 the Master Donor Viruses of the Two Commercial Human Live Attenuated  
1084 Influenza Vaccines. *Viruses* 11.

1085 34. Blanco-Lobo P, Rodriguez L, Reedy S, Oladunni FS, Nogales A, Murcia PR,  
1086 Chambers TM, Martinez-Sobrido L. 2019. A Bivalent Live-Attenuated Vaccine for  
1087 the Prevention of Equine Influenza Virus. *Viruses* 11.

1088 35. Rodriguez L, Reedy S, Nogales A, Murcia PR, Chambers TM, Martinez-Sobrido  
1089 L. 2018. Development of a novel equine influenza virus live-attenuated vaccine.  
1090 *Virology* 516:76-85.

1091 36. Jack BR, Boutz DR, Paff ML, Smith BL, Bull JJ, Wilke CO. 2017. Reduced  
1092 Protein Expression in a Virus Attenuated by Codon Deoptimization. *G3*  
1093 (Bethesda) 7:2957-2968.

1094 37. Fan RL, Valkenburg SA, Wong CK, Li OT, Nicholls JM, Rabadan R, Peiris JS,  
1095 Poon LL. 2015. Generation of Live Attenuated Influenza Virus by Using Codon  
1096 Usage Bias. *J Virol* 89:10762-73.

1097 38. Chiem K, Lorenzo M, Rangel-Moreno J, De La Luz Garcia-Hernandez M, Park J-  
1098 G, Nogales A, Blasco R, Martínez-Sobrido L. 2021. Bi-reporter vaccinia virus for

1099 tracking viral infections *in vitro* and *in vivo*. bioRxiv  
1100 doi:10.1101/2021.08.24.457594:2021.08.24.457594.

1101 39. Nogales A, Ávila-Pérez G, Rangel-Moreno J, Chiem K, DeDiego ML, Martínez-  
1102 Sobrido L. 2019. A novel fluorescent and bioluminescent Bi-Reporter influenza A  
1103 virus (BIRFLU) to evaluate viral infections. *J Virol* doi:10.1128/JVI.00032-19.

1104 40. DiPiazza A, Nogales A, Poulton N, Wilson PC, Martinez-Sobrido L, Sant AJ.  
1105 2017. Pandemic 2009 H1N1 Influenza Venus reporter virus reveals broad  
1106 diversity of MHC class II-positive antigen-bearing cells following infection *in vivo*.  
1107 *Scientific Reports* 7:10857.

1108 41. Zou G, Xu HY, Qing M, Wang QY, Shi PY. 2011. Development and  
1109 characterization of a stable luciferase dengue virus for high-throughput  
1110 screening. *Antiviral Res* 91:11-9.

1111 42. Ozawa M, Victor ST, Taft AS, Yamada S, Li C, Hatta M, Das SC, Takashita E,  
1112 Kakugawa S, Maher EA, Neumann G, Kawaoka Y. 2011. Replication-  
1113 incompetent influenza A viruses that stably express a foreign gene. *J Gen Virol*  
1114 92:2879-88.

1115 43. Rimmelzwaan GF, Verburgh RJ, Nieuwkoop NJ, Bestebroer TM, Fouchier RA,  
1116 Osterhaus AD. 2011. Use of GFP-expressing influenza viruses for the detection  
1117 of influenza virus A/H5N1 neutralizing antibodies. *Vaccine* 29:3424-30.

1118 44. Nogales A, Baker SF, Martínez-Sobrido L. 2015. Replication-competent influenza  
1119 A viruses expressing a red fluorescent protein. *Virology* 476:206-16.



- 1120 45. Ye C, Chiem K, Park J-G, Silvas JA, Vasquez DM, Torrelles JB, Kobie JJ, Walter  
1121 MR, de la Torre JC, Martinez-Sobrido L. 2021. Visualization of SARS-CoV-2  
1122 infection dynamic. bioRxiv doi:10.1101/2021.06.03.446942:2021.06.03.446942.
- 1123 46. Chiem K, Morales Vasquez D, Park JG, Platt RN, Anderson T, Walter MR, Kobie  
1124 JJ, Ye C, Martinez-Sobrido L. 2021. Generation and Characterization of  
1125 recombinant SARS-CoV-2 expressing reporter genes. J Virol  
1126 doi:10.1128/JVI.02209-20.
- 1127 47. Chiem K, Morales Vasquez D, Silvas JA, Park JG, Piepenbrink MS, Sourimant J,  
1128 Lin MJ, Greninger AL, Plemper RK, Torrelles JB, Walter MR, de la Torre JC,  
1129 Kobie JK, Ye C, Martinez-Sobrido L. 2021. A Bifluorescent-Based Assay for the  
1130 Identification of Neutralizing Antibodies against SARS-CoV-2 Variants of  
1131 Concern. J Virol 95:e0112621.
- 1132 48. Xie X, Muruato AE, Zhang X, Lokugamage KG, Fontes-Garfias CR, Zou J, Liu J,  
1133 Ren P, Balakrishnan M, Cihlar T, Tseng C-TK, Makino S, Menachery VD, Bilello  
1134 JP, Shi P-Y. 2020. A nanoluciferase SARS-CoV-2 for rapid neutralization testing  
1135 and screening of anti-infective drugs for COVID-19. bioRxiv  
1136 doi:10.1101/2020.06.22.165712:2020.06.22.165712.
- 1137 49. Xie X, Muruato A, Lokugamage KG, Narayanan K, Zhang X, Zou J, Liu J,  
1138 Schindewolf C, Bopp NE, Aguilar PV, Plante KS, Weaver SC, Makino S, LeDuc  
1139 JW, Menachery VD, Shi PY. 2020. An Infectious cDNA Clone of SARS-CoV-2.  
1140 Cell Host Microbe 27:841-848.e3.
- 1141 50. Hall MP, Unch J, Binkowski BF, Valley MP, Butler BL, Wood MG, Otto P,  
1142 Zimmerman K, Vidugiris G, Machleidt T, Robers MB, Benink HA, Eggers CT,

1143 Slater MR, Meisenheimer PL, Klaubert DH, Fan F, Encell LP, Wood KV. 2012.  
1144 Engineered luciferase reporter from a deep sea shrimp utilizing a novel  
1145 imidazopyrazinone substrate. *ACS Chem Biol* 7:1848-57.

1146 51. Tam JM, Upadhyay R, Pittet MJ, Weissleder R, Mahmood U. 2007. Improved in  
1147 vivo whole-animal detection limits of green fluorescent protein-expressing tumor  
1148 lines by spectral fluorescence imaging. *Mol Imaging* 6:269-76.

1149 52. Zhao H, Doyle TC, Coquoz O, Kalish F, Rice BW, Contag CH. 2005. Emission  
1150 spectra of bioluminescent reporters and interaction with mammalian tissue  
1151 determine the sensitivity of detection in vivo. *Journal of Biomedical Optics*  
1152 10:41210.

1153 53. Vintersten K, Monetti C, Gertsenstein M, Zhang P, Laszlo L, Biechele S, Nagy A.  
1154 2004. Mouse in red: red fluorescent protein expression in mouse ES cells,  
1155 embryos, and adult animals. *Genesis* 40:241-6.

1156 54. Kelkar M, De A. 2012. Bioluminescence based in vivo screening technologies.  
1157 *Curr Opin Pharmacol* 12:592-600.

1158 55. Shaner NC, Patterson GH, Davidson MW. 2007. Advances in fluorescent protein  
1159 technology. *J Cell Sci* 120:4247-60.

1160 56. Welsh DK, Noguchi T. 2012. Cellular bioluminescence imaging. *Cold Spring*  
1161 *Harbor Protocols* 2012.

1162 57. Nogales A, Rodriguez-Sanchez I, Monte K, Lenschow DJ, Perez DR, Martinez-  
1163 Sobrido L. 2016. Replication-competent fluorescent-expressing influenza B virus.  
1164 *Virus Res* 213:69-81.

- 1165 58. Chiem K, Rangel-Moreno J, Nogales A, Martinez-Sobrido L. 2019. A Luciferase-  
1166 fluorescent Reporter Influenza Virus for Live Imaging and Quantification of Viral  
1167 Infection. *J Vis Exp* doi:10.3791/59890.
- 1168 59. Chiem K, Ye C, Martinez-Sobrido L. 2020. Generation of Recombinant SARS-  
1169 CoV-2 Using a Bacterial Artificial Chromosome. *Curr Protoc Microbiol* 59:e126.
- 1170 60. Ye C, Chiem K, Park JG, Oladunni F, Platt RN, 2nd, Anderson T, Almazan F, de  
1171 la Torre JC, Martinez-Sobrido L. 2020. Rescue of SARS-CoV-2 from a Single  
1172 Bacterial Artificial Chromosome. *mBio* 11.
- 1173 61. Almazán F, Dediego ML, Galán C, Escors D, Alvarez E, Ortego J, Sola I, Zuñiga  
1174 S, Alonso S, Moreno JL, Nogales A, Capiscol C, Enjuanes L. 2006. Construction  
1175 of a severe acute respiratory syndrome coronavirus infectious cDNA clone and a  
1176 replicon to study coronavirus RNA synthesis. *J Virol* 80:10900-6.
- 1177 62. Bindels DS, Haarbosch L, van Weeren L, Postma M, Wiese KE, Mastop M,  
1178 Aumonier S, Gotthard G, Royant A, Hink MA, Gadella TW. 2017. mScarlet: a  
1179 bright monomeric red fluorescent protein for cellular imaging. *Nat Methods* 14:53-  
1180 56.
- 1181 63. Luker KE, Pata P, Shemiakina II, Pereverzeva A, Stacer AC, Shcherbo DS,  
1182 Pletnev VZ, Skolnaja M, Lukyanov KA, Luker GD, Pata I, Chudakov DM. 2015.  
1183 Comparative study reveals better far-red fluorescent protein for whole body  
1184 imaging. *Sci Rep* 5:10332.
- 1185 64. Shcherbo D, Merzlyak EM, Chepurnykh TV, Fradkov AF, Ermakova GV,  
1186 Solovieva EA, Lukyanov KA, Bogdanova EA, Zaraisky AG, Lukyanov S,

1187 Chudakov DM. 2007. Bright far-red fluorescent protein for whole-body imaging.  
1188 Nat Methods 4:741-6.

1189 65. Stacer AC, Nyati S, Moudgil P, Iyengar R, Luker KE, Rehemtulla A, Luker GD.  
1190 2013. NanoLuc reporter for dual luciferase imaging in living animals. Mol Imaging  
1191 12:1-13.

1192 66. Sewe SO, Silva G, Sicat P, Seal SE, Visendi P. 2022. Trimming and Validation of  
1193 Illumina Short Reads Using Trimmomatic, Trinity Assembly, and Assessment of  
1194 RNA-Seq Data. Methods Mol Biol 2443:211-232.

1195 67. Bolger AM, Lohse M, Usadel B. 2014. Trimmomatic: a flexible trimmer for  
1196 Illumina sequence data. Bioinformatics 30:2114-20.

1197 68. Langmead B, Salzberg SL. 2012. Fast gapped-read alignment with Bowtie 2. Nat  
1198 Methods 9:357-9.

1199 69. Pedersen BS, Quinlan AR. 2018. Mosdepth: quick coverage calculation for  
1200 genomes and exomes. Bioinformatics 34:867-868.

1201 70. Wilm A, Aw PP, Bertrand D, Yeo GH, Ong SH, Wong CH, Khor CC, Petric R,  
1202 Hibberd ML, Nagarajan N. 2012. LoFreq: a sequence-quality aware, ultra-  
1203 sensitive variant caller for uncovering cell-population heterogeneity from high-  
1204 throughput sequencing datasets. Nucleic Acids Res 40:11189-201.

1205 71. Park J-G, Oladunni FS, Chiem K, Ye C, Pipenbrink M, Moran T, Walter MR,  
1206 Kobie J, Martinez-Sobrido L. 2021. Rapid in vitro assays for screening  
1207 neutralizing antibodies and antivirals against SARS-CoV-2. Journal of Virological  
1208 Methods 287:113995.

1209 72. Piepenbrink MS, Park JG, Oladunni FS, Deshpande A, Basu M, Sarkar S, Loos  
1210 A, Woo J, Lovalenti P, Sloan D, Ye C, Chiem K, Bates CW, Burch RE, Erdmann  
1211 NB, Goepfert PA, Truong VL, Walter MR, Martinez-Sobrido L, Kobie JJ. 2021.  
1212 Therapeutic activity of an inhaled potent SARS-CoV-2 neutralizing human  
1213 monoclonal antibody in hamsters. *Cell Rep Med* 2:100218.

1214 73. Jensen EC. 2013. Quantitative analysis of histological staining and fluorescence  
1215 using ImageJ. *Anat Rec (Hoboken)* 296:378-81.

1216 74. Piepenbrink MS, Park J-G, Oladunni FS, Deshpande A, Basu M, Sarkar S, Loos  
1217 A, Woo J, Lovalenti P, Sloan D, Ye C, Chiem K, Erdmann NB, Goepfert PA,  
1218 Truong VL, Walter MR, Martinez-Sobrido L, Kobie JJ. 2020. Therapeutic activity  
1219 of an inhaled potent SARS-CoV-2 neutralizing human monoclonal antibody in  
1220 hamsters. *bioRxiv* doi:10.1101/2020.10.14.339150:2020.10.14.339150.

1221 75. Deshpande A, Harris BD, Martinez-Sobrido L, Kobie JJ, Walter MR. 2021.  
1222 Epitope classification and RBD binding properties of neutralizing antibodies  
1223 against SARS-CoV-2 variants of concern. *bioRxiv*  
1224 doi:10.1101/2021.04.13.439681:2021.04.13.439681.

1225 76. Oladunni FS, Park JG, Pino PA, Gonzalez O, Akhter A, Allué-Guardia A, Olmo-  
1226 Fontánez A, Gautam S, Garcia-Vilanova A, Ye C, Chiem K, Headley C, Dwivedi  
1227 V, Parodi LM, Alfson KJ, Staples HM, Schami A, Garcia JI, Whigham A, Platt RN,  
1228 Gazi M, Martinez J, Chuba C, Earley S, Rodriguez OH, Mdaki SD, Kavelish KN,  
1229 Escalona R, Hallam CRA, Christie C, Patterson JL, Anderson TJC, Carrion R,  
1230 Dick EJ, Hall-Ursone S, Schlesinger LS, Alvarez X, Kaushal D, Giavedoni LD,  
1231 Turner J, Martinez-Sobrido L, Torrelles JB. 2020. Lethality of SARS-CoV-2

1232 infection in K18 human angiotensin-converting enzyme 2 transgenic mice. Nat  
1233 Commun 11:6122.  
1234
